# Supplementary material for: Numerical Modeling and Optimization of Lead-Free Hybrid Double Perovskite Solar Cell by Using SCAPS-1D
Source: Hindawi journal article supplement (doi:10.1155/2021/6668687), 2021-07-16
Supplement: f1 [file 6668687.f1.zip]

Archive with 2 entries (2 files):
- SCAPS_MODEL_FILE.def
- Supplementary_Information.xlsx
