# Supplementary material for: Numerical Modeling and Optimization of Lead-Free Hybrid Double Perovskite Solar Cell by Using SCAPS-1D
Source: Hindawi journal article supplement (doi:10.1155/2021/6668687), 2021-07-16
Supplement: f1 [file 6668687.f1.zip › SCAPS_MODEL_FILE.def]

> SCAPS 3.3.07 ELIS-UGent: Version scaps3307.exe, dated 22-02-2019, 07:14:46 Problem definition file
> last saved by SCAPS: 	17-05-2020 at 18:01:48
> 
> Comments (to be) included in the def file
> Can be edited by the user
> SCAPS 3.3.07 ELIS-UGent: Version scaps3307.exe, dated 22-02-2019, 07:14:46
> SCAPS Material parameters file, saved on 	17-05-2020 at 16:27:56
> problem definition file loaded :
> new problem
> last saved: 	17-05-2020 at 16:27:56
> 
> SCAPS 3.3.07 ELIS-UGent: Version scaps3307.exe, dated 22-02-2019, 07:14:46
> SCAPS Material parameters file, saved on 	17-05-2020 at 16:27:56
> problem definition file loaded :
> new problem
> last saved: 	17-05-2020 at 16:27:56
> 
> SCAPS 3.3.07 ELIS-UGent: Version scaps3307.exe, dated 22-02-2019, 07:14:46
> SCAPS Material parameters file, saved on 	17-05-2020 at 16:30:46
> problem definition file loaded :
> new problem
> last saved: 	17-05-2020 at 16:30:46
> 
> SCAPS 3.3.07 ELIS-UGent: Version scaps3307.exe, dated 22-02-2019, 07:14:46
> SCAPS Material parameters file, saved on 	17-05-2020 at 16:34:45
> problem definition file loaded :
> new problem
> last saved: 	17-05-2020 at 16:34:45
> 
> SCAPS 3.3.07 ELIS-UGent: Version scaps3307.exe, dated 22-02-2019, 07:14:46
> SCAPS Material parameters file, saved on 	17-05-2020 at 16:37:04
> problem definition file loaded :
> new problem
> last saved: 	17-05-2020 at 16:37:04
> 
back contact

flatband : 0 (1: flatband contact imposed; 0: fixed Phi_m value)
recalculate : 0 (1 = do or 0 = do not recalculate phi_m to set flatband in each batch step)
Fi_m :   5.1000 [eV]
Sn :  1.000e+03 [m/s]
Sp :  1.000e+05 [m/s]
Tunneling to contact: 0 (0: no tunneling, 1: with tunneling)
Relative electron mass :  1.00e+00
Relative hole mass :  1.00e+00


layer

name : SpiroMEOTAD
d : 1.500e-07 [m]
composition grading :	  0.00000	  0.00000	  0.00000	  0.00000	  0.00000	  0.00000	  0.00000	 0	 0	[-]
v_th_n :	 1.000e+05	 1.000e+05	 1.000e+01	 1.000e+01	 1.000e+01	 1.000e+05	 1.000e+05	 1	 0	[m/s]
v_th_p :	 1.000e+05	 1.000e+05	 1.000e+01	 1.000e+01	 1.000e+01	 1.000e+05	 1.000e+05	 1	 0	[m/s]
eps :	     3.000000	    10.000000	    10.000000	    10.000000	    10.000000	     3.000000	     3.000000	 1	 0	[-]
chi :	  2.200000	  4.500000	  1.000000	  1.000000	  1.000000	  2.200000	  2.200000	 1	 0	[eV]
Eg :	  2.900000	  1.200000	  0.500000	  1.000000	  1.000000	  2.900000	  2.900000	 1	 0	[eV]
Nc :	 2.200000e+24	 1.000000e+25	 1.000000e+01	 1.000000e+01	 1.000000e+01	 2.200000e+24	 2.200000e+24	 1	 0	[/m^3]
Nv :	 1.800000e+24	 1.000000e+25	 1.000000e+01	 1.000000e+01	 1.000000e+01	 1.800000e+24	 1.800000e+24	 1	 0	[/m^3]
mu_n :	 1.000000e-08	 5.000000e-03	 1.000000e-03	 1.000000e+00	 1.000000e+00	 1.000000e-08	 1.000000e-08	 1	 0	[m^2/Vs]
mu_p :	 1.000000e-08	 5.000000e-03	 1.000000e-03	 1.000000e+00	 1.000000e+00	 1.000000e-08	 1.000000e-08	 1	 0	[m^2/Vs]
Tunneling in layer: 0 (0: no tunneling, 1: with tunneling)
Relative electron mass :	 1.000000e+00	 1.000000e+00	 1.000000e+00	 1.000000e+00	 1.000000e+00	 1.000000e+00	 1.000000e+00	 1	 0	[-]
Relative hole mass :	 1.000000e+00	 1.000000e+00	 1.000000e+00	 1.000000e+00	 1.000000e+00	 1.000000e+00	 1.000000e+00	 1	 0	[-]
K_rad :	 0.000000e+00	 0.000000e+00	 1.000000e+01	 1.000000e+01	 1.000000e+01	 0.000000e+00	 0.000000e+00	 1	 0	[m^3/s]
c_n_auger :	 0.000000e+00	 0.000000e+00	 1.000000e+01	 1.000000e+01	 1.000000e+01	 0.000000e+00	 0.000000e+00	 1	 0	[m^6/s]
c_p_auger :	 0.000000e+00	 0.000000e+00	 1.000000e+01	 1.000000e+01	 1.000000e+01	 0.000000e+00	 0.000000e+00	 1	 0	[m^6/s]
Na(uniform) :	 1.000000e+24	 1.000000e+24	 1.000000e+01	 1.000000e+01	 1.000000e+01	 1.000000e+24	 1.000000e+24	 0	 2	[/m^3]
Nd(uniform) :	 0.000000e+00	 0.000000e+00	 1.000000e+01	 1.000000e+01	 1.000000e+01	 0.000000e+00	 0.000000e+00	 0	 2	[/m^3]
absorption grading :	  427.58	 1033.31	  250.00	  250.00	    0.00	    1.20	    1.20	 7	 0	[nm]
absorptionmodel pure A material (y=0) : from file
absorptionfile pure A material (y=0) : SpiroAbs.abs
absorption pure B material (y=1), model : coefficients A and B (line inserted for compatibility with SCAPS until 3.3.06)
pure B material (y=1), A : 9.129e+06 [/(m*sqrt(eV))] (line inserted for compatibility with SCAPS until 3.3.06)
pure B material (y=1), B : 0.000e+00 [sqrt(eV)/m] (line inserted for compatibility with SCAPS until 3.3.06)
absorption pure B material (y=1), model : from model
absorption model B, model : sqrt(hv-Eg) law (SCAPS traditional)
absorption model B, value of parameter 1 :   1.000000e+05
absorption model B, value of parameter 2 :   0.000000e+00

srhrecombination

type : neutral ( 1 level(s) )
energy distribution : single
Reference for defect energy :  0 ; 0 = above EV (SCAPS<2.7); 1 = above Ei; 2 = below EC
Ekar :  0.1000 [eV]
Nt(uniform) :	 1.000000e+21	 1.000000e+20	 1.000000e+20	 1.000000e+00	 1.000000e+00	 1.000000e+21	 1.000000e+21	 0	 2	[/m^3]
profile : homogenous
Lkar : 1.000e+00 [m]
Nleft : 1.000e+21 [/m^3]
Nright : 1.000e+21 [/m^3]
leveltype : neutral	
sigma_n : 1.000e-19	[m^2]
sigma_p : 1.000e-19	[m^2]
Et :   0.600	[eV]

interface properties

interfacename : IL 1
Intraband tunneling : 0 (0: no tunneling, 1: with tunneling)
Relative electron mass :  1.00e+00
Relative hole mass :  1.00e+00

interface recombination

type : neutral
sigma_nleft : 1.000e-23 [m^2]
sigma_nright : 1.000e-23 [m^2]
sigma_pleft : 1.000e-23 [m^2]
sigma_pright : 1.000e-23 [m^2]
Tunneling to trap: 0 (0: no tunneling, 1: with tunneling)
Relative electron mass :  1.00e+00
Relative hole mass :  1.00e+00
energy distribution : single
Reference for defect energy :  3 ; 3 = above highest EV; 4 = below lowest EC; 5 = above Ei left; 6 = above Ei right; 7 = above EV left (= SCAPS%<2.7 reference); 8 = above EV right; 9 = above middle of interface gap
Et :  0.60 [eV]
Ekar :  0.10 [eV]
N : 1.000e+17 [/m^2]


layer

name : Perovskite
d : 3.000e-07 [m]
composition grading :	  0.00000	  0.00000	  0.00000	  0.00000	  0.00000	  0.00000	  0.00000	 0	 0	[-]
v_th_n :	 1.000e+05	 1.000e+05	 1.000e+01	 1.000e+01	 1.000e+01	 1.000e+05	 1.000e+05	 1	 0	[m/s]
v_th_p :	 1.000e+05	 1.000e+05	 1.000e+01	 1.000e+01	 1.000e+01	 1.000e+05	 1.000e+05	 1	 0	[m/s]
eps :	     5.270000	    10.000000	    10.000000	    10.000000	    10.000000	     5.270000	     5.270000	 1	 0	[-]
chi :	  3.700000	  4.500000	  1.000000	  1.000000	  1.000000	  3.700000	  3.700000	 1	 0	[eV]
Eg :	  1.550000	  3.200000	  0.500000	  1.000000	  1.000000	  1.550000	  1.550000	 1	 0	[eV]
Nc :	 2.200000e+24	 1.000000e+25	 1.000000e+01	 1.000000e+01	 1.000000e+01	 2.200000e+24	 2.200000e+24	 1	 0	[/m^3]
Nv :	 1.800000e+24	 1.000000e+25	 1.000000e+01	 1.000000e+01	 1.000000e+01	 1.800000e+24	 1.800000e+24	 1	 0	[/m^3]
mu_n :	 2.000000e-04	 5.000000e-03	 1.000000e-03	 1.000000e+00	 1.000000e+00	 2.000000e-04	 2.000000e-04	 1	 0	[m^2/Vs]
mu_p :	 2.000000e-04	 5.000000e-03	 1.000000e-03	 1.000000e+00	 1.000000e+00	 2.000000e-04	 2.000000e-04	 1	 0	[m^2/Vs]
Tunneling in layer: 0 (0: no tunneling, 1: with tunneling)
Relative electron mass :	 1.000000e+00	 1.000000e+00	 1.000000e+00	 1.000000e+00	 1.000000e+00	 1.000000e+00	 1.000000e+00	 1	 0	[-]
Relative hole mass :	 1.000000e+00	 1.000000e+00	 1.000000e+00	 1.000000e+00	 1.000000e+00	 1.000000e+00	 1.000000e+00	 1	 0	[-]
K_rad :	 0.000000e+00	 0.000000e+00	 1.000000e+01	 1.000000e+01	 1.000000e+01	 0.000000e+00	 0.000000e+00	 1	 0	[m^3/s]
c_n_auger :	 0.000000e+00	 0.000000e+00	 1.000000e+01	 1.000000e+01	 1.000000e+01	 0.000000e+00	 0.000000e+00	 1	 0	[m^6/s]
c_p_auger :	 0.000000e+00	 0.000000e+00	 1.000000e+01	 1.000000e+01	 1.000000e+01	 0.000000e+00	 0.000000e+00	 1	 0	[m^6/s]
Na(uniform) :	 0.000000e+00	 0.000000e+00	 1.000000e+01	 1.000000e+01	 1.000000e+01	 0.000000e+00	 0.000000e+00	 0	 2	[/m^3]
Nd(uniform) :	 1.000000e+19	 1.000000e+19	 1.000000e+01	 1.000000e+01	 1.000000e+01	 1.000000e+19	 1.000000e+19	 0	 2	[/m^3]
absorption grading :	  799.99	  387.49	  250.00	  250.00	    0.00	    1.20	    1.20	 7	 0	[nm]
absorptionmodel pure A material (y=0) : from file
absorptionfile pure A material (y=0) : FeroExtMain.abs
absorption pure B material (y=1), model : coefficients A and B (line inserted for compatibility with SCAPS until 3.3.06)
pure B material (y=1), A : 5.590e+06 [/(m*sqrt(eV))] (line inserted for compatibility with SCAPS until 3.3.06)
pure B material (y=1), B : 0.000e+00 [sqrt(eV)/m] (line inserted for compatibility with SCAPS until 3.3.06)
absorption pure B material (y=1), model : from model
absorption model B, model : sqrt(hv-Eg) law (SCAPS traditional)
absorption model B, value of parameter 1 :   1.000000e+05
absorption model B, value of parameter 2 :   0.000000e+00

srhrecombination

type : neutral ( 1 level(s) )
energy distribution : single
Reference for defect energy :  0 ; 0 = above EV (SCAPS<2.7); 1 = above Ei; 2 = below EC
Ekar :  0.1000 [eV]
Nt(uniform) :	 2.500000e+19	 1.000000e+20	 1.000000e+20	 1.000000e+00	 1.000000e+00	 2.500000e+19	 2.500000e+19	 0	 2	[/m^3]
profile : homogenous
Lkar : 1.000e+00 [m]
Nleft : 2.500e+19 [/m^3]
Nright : 2.500e+19 [/m^3]
leveltype : neutral	
sigma_n : 1.000e-19	[m^2]
sigma_p : 1.000e-19	[m^2]
Et :   0.600	[eV]

interface properties

interfacename : IL 2
Intraband tunneling : 0 (0: no tunneling, 1: with tunneling)
Relative electron mass :  1.00e+00
Relative hole mass :  1.00e+00

interface recombination

type : neutral
sigma_nleft : 1.000e-23 [m^2]
sigma_nright : 1.000e-23 [m^2]
sigma_pleft : 1.000e-23 [m^2]
sigma_pright : 1.000e-23 [m^2]
Tunneling to trap: 0 (0: no tunneling, 1: with tunneling)
Relative electron mass :  1.00e+00
Relative hole mass :  1.00e+00
energy distribution : single
Reference for defect energy :  3 ; 3 = above highest EV; 4 = below lowest EC; 5 = above Ei left; 6 = above Ei right; 7 = above EV left (= SCAPS%<2.7 reference); 8 = above EV right; 9 = above middle of interface gap
Et :  0.60 [eV]
Ekar :  0.10 [eV]
N : 1.000e+17 [/m^2]


layer

name : TiO2
d : 5.000e-08 [m]
composition grading :	  0.00000	  0.00000	  0.00000	  0.00000	  0.00000	  0.00000	  0.00000	 0	 0	[-]
v_th_n :	 1.000e+05	 1.000e+05	 1.000e+01	 1.000e+01	 1.000e+01	 1.000e+05	 1.000e+05	 1	 0	[m/s]
v_th_p :	 1.000e+05	 1.000e+05	 1.000e+01	 1.000e+01	 1.000e+01	 1.000e+05	 1.000e+05	 1	 0	[m/s]
eps :	    10.000000	    10.000000	    10.000000	    10.000000	    10.000000	    10.000000	    10.000000	 1	 0	[-]
chi :	  4.000000	  4.500000	  1.000000	  1.000000	  1.000000	  4.000000	  4.000000	 1	 0	[eV]
Eg :	  3.200000	  1.550000	  0.500000	  1.000000	  1.000000	  3.200000	  3.200000	 1	 0	[eV]
Nc :	 2.200000e+24	 1.000000e+25	 1.000000e+01	 1.000000e+01	 1.000000e+01	 2.200000e+24	 2.200000e+24	 1	 0	[/m^3]
Nv :	 1.800000e+24	 1.000000e+25	 1.000000e+01	 1.000000e+01	 1.000000e+01	 1.800000e+24	 1.800000e+24	 1	 0	[/m^3]
mu_n :	 2.000000e-03	 5.000000e-03	 1.000000e-03	 1.000000e+00	 1.000000e+00	 2.000000e-03	 2.000000e-03	 1	 0	[m^2/Vs]
mu_p :	 1.000000e-03	 5.000000e-03	 1.000000e-03	 1.000000e+00	 1.000000e+00	 1.000000e-03	 1.000000e-03	 1	 0	[m^2/Vs]
Tunneling in layer: 0 (0: no tunneling, 1: with tunneling)
Relative electron mass :	 1.000000e+00	 1.000000e+00	 1.000000e+00	 1.000000e+00	 1.000000e+00	 1.000000e+00	 1.000000e+00	 1	 0	[-]
Relative hole mass :	 1.000000e+00	 1.000000e+00	 1.000000e+00	 1.000000e+00	 1.000000e+00	 1.000000e+00	 1.000000e+00	 1	 0	[-]
K_rad :	 0.000000e+00	 0.000000e+00	 1.000000e+01	 1.000000e+01	 1.000000e+01	 0.000000e+00	 0.000000e+00	 1	 0	[m^3/s]
c_n_auger :	 0.000000e+00	 0.000000e+00	 1.000000e+01	 1.000000e+01	 1.000000e+01	 0.000000e+00	 0.000000e+00	 1	 0	[m^6/s]
c_p_auger :	 0.000000e+00	 0.000000e+00	 1.000000e+01	 1.000000e+01	 1.000000e+01	 0.000000e+00	 0.000000e+00	 1	 0	[m^6/s]
Na(uniform) :	 0.000000e+00	 0.000000e+00	 1.000000e+01	 1.000000e+01	 1.000000e+01	 0.000000e+00	 0.000000e+00	 0	 2	[/m^3]
Nd(uniform) :	 1.000000e+23	 1.000000e+23	 1.000000e+01	 1.000000e+01	 1.000000e+01	 1.000000e+23	 1.000000e+23	 0	 2	[/m^3]
absorption grading :	  387.49	  799.99	  250.00	  250.00	    0.00	    1.20	    1.20	 7	 0	[nm]
absorptionmodel pure A material (y=0) : from file
absorptionfile pure A material (y=0) : TiO2.abs
absorption pure B material (y=1), model : coefficients A and B (line inserted for compatibility with SCAPS until 3.3.06)
pure B material (y=1), A : 8.032e+06 [/(m*sqrt(eV))] (line inserted for compatibility with SCAPS until 3.3.06)
pure B material (y=1), B : 0.000e+00 [sqrt(eV)/m] (line inserted for compatibility with SCAPS until 3.3.06)
absorption pure B material (y=1), model : from model
absorption model B, model : sqrt(hv-Eg) law (SCAPS traditional)
absorption model B, value of parameter 1 :   1.000000e+05
absorption model B, value of parameter 2 :   0.000000e+00

srhrecombination

type : neutral ( 1 level(s) )
energy distribution : single
Reference for defect energy :  0 ; 0 = above EV (SCAPS<2.7); 1 = above Ei; 2 = below EC
Ekar :  0.1000 [eV]
Nt(uniform) :	 1.000000e+21	 1.000000e+20	 1.000000e+20	 1.000000e+00	 1.000000e+00	 1.000000e+21	 1.000000e+21	 0	 2	[/m^3]
profile : homogenous
Lkar : 1.000e+00 [m]
Nleft : 1.000e+21 [/m^3]
Nright : 1.000e+21 [/m^3]
leveltype : neutral	
sigma_n : 1.000e-19	[m^2]
sigma_p : 1.000e-19	[m^2]
Et :   0.600	[eV]

interface properties

interfacename : 
Intraband tunneling : 0 (0: no tunneling, 1: with tunneling)
Relative electron mass :  1.00e+00
Relative hole mass :  1.00e+00


layer

name : FTO
d : 2.000e-07 [m]
composition grading :	  0.00000	  0.00000	  0.00000	  0.00000	  0.00000	  0.00000	  0.00000	 0	 0	[-]
v_th_n :	 1.000e+05	 1.000e+05	 1.000e+01	 1.000e+01	 1.000e+01	 1.000e+05	 1.000e+05	 1	 0	[m/s]
v_th_p :	 1.000e+05	 1.000e+05	 1.000e+01	 1.000e+01	 1.000e+01	 1.000e+05	 1.000e+05	 1	 0	[m/s]
eps :	     9.000000	    10.000000	    10.000000	    10.000000	    10.000000	     9.000000	     9.000000	 1	 0	[-]
chi :	  4.000000	  4.500000	  1.000000	  1.000000	  1.000000	  4.000000	  4.000000	 1	 0	[eV]
Eg :	  3.500000	  2.900000	  0.500000	  1.000000	  1.000000	  3.500000	  3.500000	 1	 0	[eV]
Nc :	 2.200000e+24	 1.000000e+25	 1.000000e+01	 1.000000e+01	 1.000000e+01	 2.200000e+24	 2.200000e+24	 1	 0	[/m^3]
Nv :	 1.800000e+24	 1.000000e+25	 1.000000e+01	 1.000000e+01	 1.000000e+01	 1.800000e+24	 1.800000e+24	 1	 0	[/m^3]
mu_n :	 2.000000e-03	 5.000000e-03	 1.000000e-03	 1.000000e+00	 1.000000e+00	 2.000000e-03	 2.000000e-03	 1	 0	[m^2/Vs]
mu_p :	 1.000000e-03	 5.000000e-03	 1.000000e-03	 1.000000e+00	 1.000000e+00	 1.000000e-03	 1.000000e-03	 1	 0	[m^2/Vs]
Tunneling in layer: 0 (0: no tunneling, 1: with tunneling)
Relative electron mass :	 1.000000e+00	 1.000000e+00	 1.000000e+00	 1.000000e+00	 1.000000e+00	 1.000000e+00	 1.000000e+00	 1	 0	[-]
Relative hole mass :	 1.000000e+00	 1.000000e+00	 1.000000e+00	 1.000000e+00	 1.000000e+00	 1.000000e+00	 1.000000e+00	 1	 0	[-]
K_rad :	 0.000000e+00	 0.000000e+00	 1.000000e+01	 1.000000e+01	 1.000000e+01	 0.000000e+00	 0.000000e+00	 1	 0	[m^3/s]
c_n_auger :	 0.000000e+00	 0.000000e+00	 1.000000e+01	 1.000000e+01	 1.000000e+01	 0.000000e+00	 0.000000e+00	 1	 0	[m^6/s]
c_p_auger :	 0.000000e+00	 0.000000e+00	 1.000000e+01	 1.000000e+01	 1.000000e+01	 0.000000e+00	 0.000000e+00	 1	 0	[m^6/s]
Na(uniform) :	 0.000000e+00	 0.000000e+00	 1.000000e+01	 1.000000e+01	 1.000000e+01	 0.000000e+00	 0.000000e+00	 0	 2	[/m^3]
Nd(uniform) :	 1.000000e+25	 1.000000e+25	 1.000000e+01	 1.000000e+01	 1.000000e+01	 1.000000e+25	 1.000000e+25	 0	 2	[/m^3]
absorption grading :	  354.28	  427.58	  250.00	  250.00	    0.00	    1.20	    1.20	 7	 0	[nm]
absorptionmodel pure A material (y=0) : from file
absorptionfile pure A material (y=0) : FTO.abs
absorption pure B material (y=1), model : coefficients A and B (line inserted for compatibility with SCAPS until 3.3.06)
pure B material (y=1), A : 5.872e+06 [/(m*sqrt(eV))] (line inserted for compatibility with SCAPS until 3.3.06)
pure B material (y=1), B : 0.000e+00 [sqrt(eV)/m] (line inserted for compatibility with SCAPS until 3.3.06)
absorption pure B material (y=1), model : from model
absorption model B, model : sqrt(hv-Eg) law (SCAPS traditional)
absorption model B, value of parameter 1 :   1.000000e+05
absorption model B, value of parameter 2 :   0.000000e+00

srhrecombination

type : neutral ( 1 level(s) )
energy distribution : single
Reference for defect energy :  0 ; 0 = above EV (SCAPS<2.7); 1 = above Ei; 2 = below EC
Ekar :  0.1000 [eV]
Nt(uniform) :	 1.000000e+21	 1.000000e+20	 1.000000e+20	 1.000000e+00	 1.000000e+00	 1.000000e+21	 1.000000e+21	 0	 2	[/m^3]
profile : homogenous
Lkar : 1.000e+00 [m]
Nleft : 1.000e+21 [/m^3]
Nright : 1.000e+21 [/m^3]
leveltype : neutral	
sigma_n : 1.000e-19	[m^2]
sigma_p : 1.000e-19	[m^2]
Et :   0.600	[eV]


front contact

flatband : 0 (1: flatband contact imposed; 0: fixed Phi_m value)
recalculate : 0 (1 = do or 0 = do not recalculate phi_m to set flatband in each batch step)
Fi_m :  4.40 [eV]
Sn : 1.000e+05 [m/s]
Sp : 1.000e+03 [m/s]
Tunneling to contact: 0 (0: no tunneling, 1: with tunneling)
Relative electron mass :  1.00e+00
Relative hole mass :  1.00e+00


working point

illuminated from : right
internal Rfront :   0.00000000
internal Tfront :  1.0000e+00
voltage V applied to : -1 (+1: right contact; -1: left contact)
cell reference system :  1 (1: as a consumer (consumed power = +VJ; 0: as a generator (generated power = +VJ) )
