# Supplementary material for: Numerical Modeling and Optimization of Lead-Free Hybrid Double Perovskite Solar Cell by Using SCAPS-1D
Source: Hindawi journal article supplement (doi:10.1155/2021/6668687), 2021-07-16
Supplement: f1 [file 6668687.f1.zip › Supplementary_Information.xlsx]

## Sheet: Spiro-OMeTAD
Wavelength (nm)	Refractive Index (n)	Wavelength (nm)	Extinction Coefficient (k)	Absorption coeff α (cm⁻¹)	REFRENCE
350.024	1.61468	350.024	0.288449	103557	[ 40] Miha Filipič, Philipp Löper, Bjoern Niesen, Stefaan De Wolf, Janez Krč, Christophe Ballif and Marko Topič, '	(2,2',7,7'-tetrakis(N,N-di-p-methoxyphenylamine)-9,9-spirobifluorene) was purchased from Merck KGaA
360.024	1.65029	360.024	0.328615	114701	CH3NH3PbI3 perovskite / silicon tandem solar cells: characterization based optical simulations',
370.025	1.70753	370.025	0.352452	119696	Optics Express 23(7), pp.A263, (2015)
380.026	1.77959	380.026	0.349067	115427
390.026	1.8526	390.026	0.310192	99941.6
400.027	1.90604	400.027	0.235438	73960
410.028	1.91785	410.028	0.139594	42782.2
420.028	1.88026	420.028	0.055141	16497
430.029	1.81616	430.029	0.012293	3592.28
440.03	1.76185	440.03	0.009268	2646.76
450.03	1.73207	450.03	0.021475	5996.55
460.031	1.71984	460.031	0.031261	8539.36
470.032	1.7149	470.032	0.034394	9195.29
480.033	1.71142	480.033	0.032619	8539.06
490.033	1.70728	490.033	0.028447	7294.93
500.034	1.70216	500.034	0.023627	5937.71
510.034	1.69637	510.034	0.019098	4705.42
520.035	1.69029	520.035	0.015254	3686.05
530.036	1.68425	530.036	0.01219	2890.07
540.037	1.67848	540.037	0.009852	2292.51
550.037	1.67309	550.037	0.008134	1858.33
560.038	1.66816	560.038	0.006915	1551.62
570.039	1.66368	570.039	0.006084	1341.2
580.039	1.65964	580.039	0.005548	1201.96
590.04	1.65601	590.04	0.005232	1114.28
600.041	1.65276	600.041	0.005078	1063.46
610.041	1.64985	610.041	0.005039	1037.99
620.042	1.64724	620.042	0.005083	1030.17
630.043	1.64488	630.043	0.005185	1034.16
640.043	1.64277	640.043	0.005326	1045.69
650.044	1.64085	650.044	0.005493	1061.88
660.045	1.63911	660.045	0.005677	1080.83
670.045	1.63752	670.045	0.00587	1100.89
680.046	1.63606	680.046	0.006068	1121.29
690.047	1.63473	690.047	0.006268	1141.46
700.047	1.63349	700.047	0.006469	1161.23
710.048	1.63234	710.048	0.006668	1180.1
720.049	1.63127	720.049	0.006866	1198.26
730.049	1.63027	730.049	0.007063	1215.76
740.05	1.62932	740.05	0.007257	1232.27
750.051	1.62842	750.051	0.007452	1248.51
760.051	1.62757	760.051	0.007645	1263.99
770.052	1.62675	770.052	0.007839	1279.24
780.053	1.62597	780.053	0.008035	1294.41
790.053	1.62521	790.053	0.008232	1309.36
800.054	1.62447	800.054	0.008432	1324.41
810.055	1.62376	810.055	0.008635	1339.55
820.055	1.62306	820.055	0.008844	1355.24
830.056	1.62237	830.056	0.009057	1371.16
840.057	1.62169	840.057	0.009277	1387.74
850.058	1.62102	850.058	0.009505	1405.12
860.058	1.62035	860.058	0.00974	1423.12
870.059	1.61969	870.059	0.009985	1442.15
880.059	1.61903	880.059	0.010239	1462.03
890.06	1.61837	890.06	0.010505	1483.15
900.061	1.6177	900.061	0.010783	1505.49
910.062	1.61704	910.062	0.011073	1528.99
920.062	1.61637	920.062	0.011378	1554.03
930.063	1.61569	930.063	0.011698	1580.55
940.064	1.615	940.064	0.012034	1608.65
950.064	1.61431	950.064	0.012388	1638.54
960.065	1.6136	960.065	0.01276	1670.17
970.066	1.61289	970.066	0.013153	1703.86
980.066	1.61217	980.066	0.013566	1739.43
990.067	1.61143	990.067	0.014002	1777.2
1000.07	1.61068	1000.07	0.014462	1817.23
1010.07	1.60992	1010.07	0.014948	1859.7
1020.07	1.60915	1020.07	0.015462	1904.79
1030.07	1.60836	1030.07	0.016004	1952.41
1040.07	1.60755	1040.07	0.016577	2002.87
1050.07	1.60674	1050.07	0.017184	2056.44
1060.07	1.6059	1060.07	0.017825	2113.02
1070.07	1.60505	1070.07	0.018503	2172.9
1080.07	1.60419	1080.07	0.01922	2236.2
1090.07	1.60331	1090.07	0.019979	2303.18
1100.07	1.60242	1100.07	0.020783	2374.08
1110.08	1.60151	1110.08	0.021633	2448.92
1120.08	1.60059	1120.08	0.022534	2528.14
1130.08	1.59966	1130.08	0.023487	2611.74
1140.08	1.59871	1140.08	0.024497	2700.15
1150.08	1.59775	1150.08	0.025566	2793.48
1160.08	1.59678	1160.08	0.026699	2892.13
1170.08	1.59581	1170.08	0.027898	2996.18
1180.08	1.59483	1180.08	0.029168	3106.03
1190.08	1.59384	1190.08	0.030513	3221.95
1200.08	1.59285	1200.08	0.031937	3344.21

## Sheet: TiO2
Wavelength (um)	Refractive Index (n)	Extinction Coeff (k)	Wavelength (nm)	Abs Coeff (1/m)		RERFRENCE:
1.53846	2.43346	0.0001	1538.46	816.401		[39] J. Kischkat, S. Peters, B. Gruska, M. Semtsiv, M. Chashnikova, M. Klinkmüller, O. Fedosenko, S. Machulik, A. Aleksandrova, G. Monastyrskyi, Y. Flores, and W. T. Masselink.
1.53941	2.4334	0.0001	1539.41	815.897		Mid-infrared optical properties of thin films of aluminum oxide, titanium dioxide, silicon dioxide, aluminum nitride, and silicon nitride,
1.54036	2.43334	0.0001	1540.36	815.394		Appl. Opt. 51, 6789-6798 (2012)
1.54131	2.43329	0.0001	1541.31	814.891
1.54226	2.43323	0.0001	1542.26	814.389
1.54321	2.43317	0.0001	1543.21	813.888
1.54416	2.43312	0.0001	1544.16	813.387
1.54512	2.43306	0.0001	1545.12	812.882
1.54607	2.433	0.0001	1546.07	812.382
1.54703	2.43295	0.0001	1547.03	811.878
1.54799	2.43289	0.0001	1547.99	811.375
1.54895	2.43283	0.0001	1548.95	810.872
1.54991	2.43277	0.0001	1549.91	810.37
1.55087	2.43272	0.0001	1550.87	809.868
1.55183	2.43266	0.0001	1551.83	809.367
1.5528	2.4326	0.0001	1552.8	808.861
1.55376	2.43255	0.0001	1553.76	808.362
1.55473	2.43249	0.0001	1554.73	807.857
1.55569	2.43243	0.0001	1555.69	807.359
1.55666	2.43238	0.0001	1556.66	806.856
1.55763	2.43232	0.0001	1557.63	806.353
1.5586	2.43226	0.0001	1558.6	805.851
1.55958	2.43221	0.0001	1559.58	805.345
1.56055	2.43215	0.0001	1560.55	804.844
1.56152	2.43209	0.0001	1561.52	804.344
1.5625	2.43204	0.0001	1562.5	803.84
1.56348	2.43198	0.0001	1563.48	803.336
1.56446	2.43192	0.0001	1564.46	802.833
1.56544	2.43187	0.0001	1565.44	802.33
1.56642	2.43181	0.0001	1566.42	801.828
1.5674	2.43175	0.0001	1567.4	801.327
1.56838	2.4317	0.0001	1568.38	800.826
1.56937	2.43164	0.0001	1569.37	800.321
1.57035	2.43158	0.0001	1570.35	799.822
1.57134	2.43153	0.0001	1571.34	799.318
1.57233	2.43147	0.0001	1572.33	798.814
1.57332	2.43141	0.0001	1573.32	798.312
1.57431	2.43136	0.0001	1574.31	797.81
1.5753	2.4313	0.0001	1575.3	797.308
1.57629	2.43124	0.0001	1576.29	796.808
1.57729	2.43119	0.0001	1577.29	796.303
1.57828	2.43113	0.0001	1578.28	795.803
1.57928	2.43107	0.0001	1579.28	795.299
1.58028	2.43102	0.0001	1580.28	794.796
1.58128	2.43096	0.0001	1581.28	794.293
1.58228	2.4309	0.0001	1582.28	793.791
1.58328	2.43085	0.0001	1583.28	793.29
1.58428	2.43079	0.0001	1584.28	792.789
1.58529	2.43073	0.0001	1585.29	792.284
1.58629	2.43068	0.0001	1586.29	791.785
1.5873	2.43062	0.0001	1587.3	791.281
1.58831	2.43056	0.0001	1588.31	790.778
1.58932	2.43051	0.0001	1589.32	790.275
1.59033	2.43045	0.0001	1590.33	789.773
1.59134	2.43039	0.0001	1591.34	789.272
1.59236	2.43034	0.0001	1592.36	788.766
1.59337	2.43028	0.0001	1593.37	788.266
1.59439	2.43022	0.0001	1594.39	787.762
1.59541	2.43017	0.0001	1595.41	787.258
1.59642	2.43011	0.0001	1596.42	786.76
1.59744	2.43005	0.0001	1597.44	786.258
1.59847	2.43	0.0001	1598.47	785.751
1.59949	2.42994	0.0001	1599.49	785.25
1.60051	2.42988	0.0001	1600.51	784.75
1.60154	2.42983	0.0001	1601.54	784.245
1.60256	2.42977	0.0001	1602.56	783.746
1.60359	2.42971	0.0001	1603.59	783.243
1.60462	2.42966	0.0001	1604.62	782.74
1.60565	2.4296	0.0001	1605.65	782.238
1.60668	2.42954	0.0001	1606.68	781.736
1.60772	2.42949	0.0001	1607.72	781.231
1.60875	2.42943	0.00011	1608.75	858.803
1.60979	2.42937	0.00011	1609.79	858.249
1.61082	2.42932	0.00011	1610.82	857.7
1.61186	2.42926	0.00011	1611.86	857.146
1.6129	2.4292	0.00011	1612.9	856.594
1.61394	2.42915	0.00011	1613.94	856.042
1.61499	2.42909	0.00011	1614.99	855.485
1.61603	2.42903	0.00011	1616.03	854.935
1.61708	2.42897	0.00011	1617.08	854.379
1.61812	2.42892	0.00011	1618.12	853.83
1.61917	2.42886	0.00011	1619.17	853.277
1.62022	2.4288	0.00011	1620.22	852.724
1.62127	2.42875	0.00011	1621.27	852.171
1.62232	2.42869	0.00011	1622.32	851.62
1.62338	2.42863	0.00011	1623.38	851.064
1.62443	2.42858	0.00011	1624.43	850.514
1.62549	2.42852	0.00011	1625.49	849.959
1.62655	2.42846	0.00011	1626.55	849.405
1.6276	2.42841	0.00011	1627.6	848.857
1.62866	2.42835	0.00011	1628.66	848.305
1.62973	2.42829	0.00011	1629.73	847.748
1.63079	2.42824	0.00011	1630.79	847.197
1.63185	2.42818	0.00011	1631.85	846.646
1.63292	2.42812	0.00011	1632.92	846.092
1.63399	2.42807	0.00011	1633.99	845.538
1.63506	2.42801	0.00011	1635.06	844.984
1.63613	2.42795	0.00011	1636.13	844.432
1.6372	2.4279	0.00011	1637.2	843.88
1.63827	2.42784	0.00011	1638.27	843.329
1.63934	2.42778	0.00011	1639.34	842.778
1.64042	2.42772	0.00011	1640.42	842.223
1.6415	2.42767	0.00011	1641.5	841.669
1.64258	2.42761	0.00011	1642.58	841.116
1.64366	2.42755	0.00011	1643.66	840.563
1.64474	2.4275	0.00011	1644.74	840.011
1.64582	2.42744	0.00011	1645.82	839.46
1.6469	2.42738	0.00011	1646.9	838.909
1.64799	2.42733	0.00011	1647.99	838.355
1.64908	2.42727	0.00011	1649.08	837.8
1.65017	2.42721	0.00011	1650.17	837.247
1.65125	2.42715	0.00011	1651.25	836.699
1.65235	2.4271	0.00011	1652.35	836.142
1.65344	2.42704	0.00011	1653.44	835.591
1.65453	2.42698	0.00011	1654.53	835.041
1.65563	2.42693	0.00011	1655.63	834.486
1.65673	2.42687	0.00011	1656.73	833.932
1.65782	2.42681	0.00011	1657.82	833.384
1.65893	2.42675	0.00011	1658.93	832.826
1.66003	2.4267	0.00011	1660.03	832.274
1.66113	2.42664	0.00011	1661.13	831.723
1.66223	2.42658	0.00011	1662.23	831.173
1.66334	2.42653	0.00011	1663.34	830.618
1.66445	2.42647	0.00011	1664.45	830.064
1.66556	2.42641	0.00011	1665.56	829.511
1.66667	2.42635	0.00011	1666.67	828.958
1.66778	2.4263	0.00011	1667.78	828.407
1.66889	2.42624	0.00011	1668.89	827.856
1.67001	2.42618	0.00011	1670.01	827.3
1.67112	2.42613	0.00011	1671.12	826.751
1.67224	2.42607	0.00011	1672.24	826.197
1.67336	2.42601	0.00011	1673.36	825.644
1.67448	2.42595	0.00011	1674.48	825.092
1.6756	2.4259	0.00011	1675.6	824.54
1.67673	2.42584	0.00011	1676.73	823.985
1.67785	2.42578	0.00011	1677.85	823.435
1.67898	2.42572	0.00011	1678.98	822.881
1.68011	2.42567	0.00011	1680.11	822.327
1.68124	2.42561	0.00011	1681.24	821.774
1.68237	2.42555	0.00011	1682.37	821.222
1.6835	2.42549	0.00011	1683.5	820.671
1.68464	2.42544	0.00012	1684.64	894.672
1.68577	2.42538	0.00012	1685.77	894.072
1.68691	2.42532	0.00012	1686.91	893.468
1.68805	2.42526	0.00012	1688.05	892.865
1.68919	2.42521	0.00012	1689.19	892.262
1.69033	2.42515	0.00012	1690.33	891.66
1.69147	2.42509	0.00012	1691.47	891.059
1.69262	2.42503	0.00012	1692.62	890.454
1.69377	2.42498	0.00012	1693.77	889.849
1.69492	2.42492	0.00012	1694.92	889.246
1.69607	2.42486	0.00012	1696.07	888.643
1.69722	2.4248	0.00012	1697.22	888.04
1.69837	2.42475	0.00012	1698.37	887.439
1.69952	2.42469	0.00012	1699.52	886.839
1.70068	2.42463	0.00012	1700.68	886.234
1.70184	2.42457	0.00012	1701.84	885.63
1.703	2.42452	0.00012	1703	885.026
1.70416	2.42446	0.00012	1704.16	884.424
1.70532	2.4244	0.00012	1705.32	883.822
1.70648	2.42434	0.00012	1706.48	883.222
1.70765	2.42428	0.00012	1707.65	882.616
1.70882	2.42423	0.00012	1708.82	882.012
1.70999	2.42417	0.00012	1709.99	881.409
1.71116	2.42411	0.00012	1711.16	880.806
1.71233	2.42405	0.00012	1712.33	880.204
1.7135	2.42399	0.00012	1713.5	879.603
1.71468	2.42394	0.00012	1714.68	878.998
1.71585	2.42388	0.00012	1715.85	878.398
1.71703	2.42382	0.00012	1717.03	877.795
1.71821	2.42376	0.00012	1718.21	877.192
1.71939	2.4237	0.00012	1719.39	876.59
1.72058	2.42365	0.00012	1720.58	875.984
1.72176	2.42359	0.00012	1721.76	875.383
1.72295	2.42353	0.00012	1722.95	874.779
1.72414	2.42347	0.00012	1724.14	874.175
1.72533	2.42341	0.00012	1725.33	873.572
1.72652	2.42336	0.00012	1726.52	872.97
1.72771	2.4233	0.00012	1727.71	872.369
1.72891	2.42324	0.00012	1728.91	871.763
1.7301	2.42318	0.00012	1730.1	871.164
1.7313	2.42312	0.00012	1731.3	870.56
1.7325	2.42306	0.00012	1732.5	869.957
1.7337	2.42301	0.00012	1733.7	869.355
1.73491	2.42295	0.00012	1734.91	868.748
1.73611	2.42289	0.00012	1736.11	868.148
1.73732	2.42283	0.00012	1737.32	867.543
1.73853	2.42277	0.00012	1738.53	866.939
1.73974	2.42271	0.00012	1739.74	866.336
1.74095	2.42266	0.00012	1740.95	865.734
1.74216	2.4226	0.00012	1742.16	865.133
1.74338	2.42254	0.00012	1743.38	864.528
1.74459	2.42248	0.00012	1744.59	863.928
1.74581	2.42242	0.00012	1745.81	863.324
1.74703	2.42236	0.00012	1747.03	862.721
1.74825	2.4223	0.00012	1748.25	862.119
1.74948	2.42224	0.00012	1749.48	861.513
1.7507	2.42219	0.00012	1750.7	860.913
1.75193	2.42213	0.00012	1751.93	860.308
1.75316	2.42207	0.00013	1753.16	931.347
1.75439	2.42201	0.00013	1754.39	930.694
1.75562	2.42195	0.00013	1755.62	930.042
1.75685	2.42189	0.00013	1756.85	929.391
1.75809	2.42183	0.00013	1758.09	928.735
1.75932	2.42177	0.00013	1759.32	928.086
1.76056	2.42171	0.00013	1760.56	927.432
1.7618	2.42166	0.00013	1761.8	926.779
1.76305	2.4216	0.00013	1763.05	926.122
1.76429	2.42154	0.00013	1764.29	925.471
1.76554	2.42148	0.00013	1765.54	924.816
1.76678	2.42142	0.00013	1766.78	924.167
1.76803	2.42136	0.00013	1768.03	923.514
1.76929	2.4213	0.00013	1769.29	922.856
1.77054	2.42124	0.00013	1770.54	922.205
1.77179	2.42118	0.00013	1771.79	921.554
1.77305	2.42112	0.00013	1773.05	920.899
1.77431	2.42106	0.00013	1774.31	920.245
1.77557	2.421	0.00013	1775.57	919.592
1.77683	2.42095	0.00013	1776.83	918.94
1.77809	2.42089	0.00013	1778.09	918.289
1.77936	2.42083	0.00013	1779.36	917.633
1.78063	2.42077	0.00013	1780.63	916.979
1.7819	2.42071	0.00013	1781.9	916.325
1.78317	2.42065	0.00013	1783.17	915.673
1.78444	2.42059	0.00013	1784.44	915.021
1.78571	2.42053	0.00013	1785.71	914.37
1.78699	2.42047	0.00013	1786.99	913.715
1.78827	2.42041	0.00013	1788.27	913.061
1.78955	2.42035	0.00013	1789.55	912.408
1.79083	2.42029	0.00013	1790.83	911.756
1.79211	2.42023	0.00013	1792.11	911.105
1.7934	2.42017	0.00013	1793.4	910.449
1.79469	2.42011	0.00013	1794.69	909.795
1.79598	2.42005	0.00013	1795.98	909.142
1.79727	2.41999	0.00013	1797.27	908.489
1.79856	2.41993	0.00013	1798.56	907.837
1.79986	2.41987	0.00013	1799.86	907.182
1.80115	2.41981	0.00013	1801.15	906.532
1.80245	2.41975	0.00013	1802.45	905.878
1.80375	2.41969	0.00013	1803.75	905.225
1.80505	2.41963	0.00013	1805.05	904.573
1.80636	2.41957	0.00013	1806.36	903.917
1.80766	2.41951	0.00013	1807.66	903.267
1.80897	2.41945	0.00013	1808.97	902.613
1.81028	2.41939	0.00013	1810.28	901.96
1.81159	2.41933	0.00013	1811.59	901.308
1.81291	2.41927	0.00013	1812.91	900.651
1.81422	2.41921	0.00014	1814.22	969.232
1.81554	2.41915	0.00014	1815.54	968.527
1.81686	2.41908	0.00014	1816.86	967.824
1.81818	2.41902	0.00014	1818.18	967.121
1.81951	2.41896	0.00014	1819.51	966.414
1.82083	2.4189	0.00014	1820.83	965.713
1.82216	2.41884	0.00014	1822.16	965.009
1.82349	2.41878	0.00014	1823.49	964.305
1.82482	2.41872	0.00014	1824.82	963.602
1.82615	2.41866	0.00014	1826.15	962.9
1.82749	2.4186	0.00014	1827.49	962.194
1.82882	2.41854	0.00014	1828.82	961.494
1.83016	2.41848	0.00014	1830.16	960.79
1.8315	2.41842	0.00014	1831.5	960.087
1.83284	2.41835	0.00014	1832.84	959.385
1.83419	2.41829	0.00014	1834.19	958.679
1.83554	2.41823	0.00014	1835.54	957.974
1.83688	2.41817	0.00014	1836.88	957.275
1.83824	2.41811	0.00014	1838.24	956.567
1.83959	2.41805	0.00014	1839.59	955.865
1.84094	2.41799	0.00014	1840.94	955.164
1.8423	2.41793	0.00014	1842.3	954.459
1.84366	2.41786	0.00014	1843.66	953.755
1.84502	2.4178	0.00014	1845.02	953.052
1.84638	2.41774	0.00014	1846.38	952.35
1.84775	2.41768	0.00014	1847.75	951.644
1.84911	2.41762	0.00014	1849.11	950.944
1.85048	2.41756	0.00014	1850.48	950.24
1.85185	2.41749	0.00014	1851.85	949.537
1.85322	2.41743	0.00014	1853.22	948.835
1.8546	2.41737	0.00014	1854.6	948.129
1.85598	2.41731	0.00014	1855.98	947.424
1.85736	2.41725	0.00014	1857.36	946.72
1.85874	2.41718	0.00014	1858.74	946.017
1.86012	2.41712	0.00014	1860.12	945.315
1.8615	2.41706	0.00014	1861.5	944.615
1.86289	2.417	0.00014	1862.89	943.91
1.86428	2.41694	0.00014	1864.28	943.206
1.86567	2.41687	0.00014	1865.67	942.503
1.86706	2.41681	0.00014	1867.06	941.802
1.86846	2.41675	0.00014	1868.46	941.096
1.86986	2.41669	0.00014	1869.86	940.391
1.87126	2.41662	0.00015	1871.26	1006.81
1.87266	2.41656	0.00015	1872.66	1006.06
1.87406	2.4165	0.00015	1874.06	1005.3
1.87547	2.41644	0.00015	1875.47	1004.55
1.87688	2.41637	0.00015	1876.88	1003.79
1.87829	2.41631	0.00015	1878.29	1003.04
1.8797	2.41625	0.00015	1879.7	1002.29
1.88111	2.41618	0.00015	1881.11	1001.54
1.88253	2.41612	0.00015	1882.53	1000.78
1.88395	2.41606	0.00015	1883.95	1000.03
1.88537	2.416	0.00015	1885.37	999.273
1.88679	2.41593	0.00015	1886.79	998.521
1.88822	2.41587	0.00015	1888.22	997.765
1.88964	2.41581	0.00015	1889.64	997.015
1.89107	2.41574	0.00015	1891.07	996.261
1.89251	2.41568	0.00015	1892.51	995.503
1.89394	2.41562	0.00015	1893.94	994.752
1.89538	2.41555	0.00015	1895.38	993.996
1.89681	2.41549	0.00015	1896.81	993.247
1.89825	2.41543	0.00015	1898.25	992.493
1.8997	2.41536	0.00015	1899.7	991.736
1.90114	2.4153	0.00015	1901.14	990.984
1.90259	2.41523	0.00015	1902.59	990.229
1.90404	2.41517	0.00015	1904.04	989.475
1.90549	2.41511	0.00015	1905.49	988.722
1.90694	2.41504	0.00015	1906.94	987.97
1.9084	2.41498	0.00015	1908.4	987.214
1.90985	2.41492	0.00015	1909.85	986.465
1.91131	2.41485	0.00015	1911.31	985.711
1.91278	2.41479	0.00015	1912.78	984.954
1.91424	2.41472	0.00015	1914.24	984.203
1.91571	2.41466	0.00015	1915.71	983.447
1.91718	2.41459	0.00015	1917.18	982.693
1.91865	2.41453	0.00015	1918.65	981.94
1.92012	2.41447	0.00015	1920.12	981.189
1.9216	2.4144	0.00015	1921.6	980.433
1.92308	2.41434	0.00015	1923.08	979.678
1.92456	2.41427	0.00016	1924.56	1044.19
1.92604	2.41421	0.00016	1926.04	1043.38
1.92753	2.41414	0.00016	1927.53	1042.58
1.92901	2.41408	0.00016	1929.01	1041.78
1.9305	2.41401	0.00016	1930.5	1040.97
1.93199	2.41395	0.00016	1931.99	1040.17
1.93349	2.41388	0.00016	1933.49	1039.36
1.93498	2.41382	0.00016	1934.98	1038.56
1.93648	2.41375	0.00016	1936.48	1037.76
1.93798	2.41369	0.00016	1937.98	1036.96
1.93949	2.41362	0.00016	1939.49	1036.15
1.94099	2.41356	0.00016	1940.99	1035.35
1.9425	2.41349	0.00016	1942.5	1034.54
1.94401	2.41342	0.00016	1944.01	1033.74
1.94553	2.41336	0.00016	1945.53	1032.93
1.94704	2.41329	0.00016	1947.04	1032.13
1.94856	2.41323	0.00016	1948.56	1031.33
1.95008	2.41316	0.00016	1950.08	1030.52
1.9516	2.4131	0.00016	1951.6	1029.72
1.95313	2.41303	0.00016	1953.13	1028.91
1.95465	2.41296	0.00016	1954.65	1028.11
1.95618	2.4129	0.00016	1956.18	1027.31
1.95771	2.41283	0.00016	1957.71	1026.51
1.95925	2.41277	0.00016	1959.25	1025.7
1.96078	2.4127	0.00016	1960.78	1024.9
1.96232	2.41263	0.00016	1962.32	1024.09
1.96386	2.41257	0.00016	1963.86	1023.29
1.96541	2.4125	0.00016	1965.41	1022.48
1.96696	2.41243	0.00016	1966.96	1021.68
1.9685	2.41237	0.00016	1968.5	1020.88
1.97006	2.4123	0.00016	1970.06	1020.07
1.97161	2.41223	0.00016	1971.61	1019.27
1.97316	2.41217	0.00017	1973.16	1082.12
1.97472	2.4121	0.00017	1974.72	1081.27
1.97628	2.41203	0.00017	1976.28	1080.41
1.97785	2.41197	0.00017	1977.85	1079.56
1.97941	2.4119	0.00017	1979.41	1078.71
1.98098	2.41183	0.00017	1980.98	1077.85
1.98255	2.41176	0.00017	1982.55	1077
1.98413	2.4117	0.00017	1984.13	1076.14
1.9857	2.41163	0.00017	1985.7	1075.29
1.98728	2.41156	0.00017	1987.28	1074.43
1.98886	2.41149	0.00017	1988.86	1073.58
1.99045	2.41143	0.00017	1990.45	1072.72
1.99203	2.41136	0.00017	1992.03	1071.87
1.99362	2.41129	0.00017	1993.62	1071.02
1.99521	2.41122	0.00017	1995.21	1070.16
1.99681	2.41115	0.00017	1996.81	1069.31
1.9984	2.41109	0.00017	1998.4	1068.45
2	2.41102	0.00017	2000	1067.6
2.0016	2.41095	0.00017	2001.6	1066.75
2.00321	2.41088	0.00017	2003.21	1065.89
2.00481	2.41081	0.00017	2004.81	1065.04
2.00642	2.41074	0.00017	2006.42	1064.18
2.00803	2.41067	0.00017	2008.03	1063.33
2.00965	2.41061	0.00017	2009.65	1062.47
2.01126	2.41054	0.00017	2011.26	1061.62
2.01288	2.41047	0.00017	2012.88	1060.77
2.0145	2.4104	0.00017	2014.5	1059.92
2.01613	2.41033	0.00017	2016.13	1059.06
2.01776	2.41026	0.00017	2017.76	1058.2
2.01939	2.41019	0.00017	2019.39	1057.35
2.02102	2.41012	0.00018	2021.02	1118.64
2.02265	2.41005	0.00018	2022.65	1117.74
2.02429	2.40998	0.00018	2024.29	1116.84
2.02593	2.40991	0.00018	2025.93	1115.93
2.02758	2.40984	0.00018	2027.58	1115.02
2.02922	2.40977	0.00018	2029.22	1114.12
2.03087	2.4097	0.00018	2030.87	1113.22
2.03252	2.40963	0.00018	2032.52	1112.31
2.03417	2.40956	0.00018	2034.17	1111.41
2.03583	2.40949	0.00018	2035.83	1110.51
2.03749	2.40942	0.00018	2037.49	1109.6
2.03915	2.40935	0.00018	2039.15	1108.7
2.04082	2.40928	0.00018	2040.82	1107.79
2.04248	2.40921	0.00018	2042.48	1106.89
2.04415	2.40914	0.00018	2044.15	1105.99
2.04583	2.40907	0.00018	2045.83	1105.08
2.0475	2.409	0.00018	2047.5	1104.18
2.04918	2.40893	0.00018	2049.18	1103.27
2.05086	2.40886	0.00018	2050.86	1102.37
2.05255	2.40879	0.00018	2052.55	1101.46
2.05423	2.40872	0.00018	2054.23	1100.56
2.05592	2.40864	0.00018	2055.92	1099.65
2.05761	2.40857	0.00018	2057.61	1098.75
2.05931	2.4085	0.00018	2059.31	1097.84
2.06101	2.40843	0.00018	2061.01	1096.94
2.06271	2.40836	0.00018	2062.71	1096.03
2.06441	2.40829	0.00019	2064.41	1155.97
2.06612	2.40821	0.00019	2066.12	1155.02
2.06782	2.40814	0.00019	2067.82	1154.07
2.06954	2.40807	0.00019	2069.54	1153.11
2.07125	2.408	0.00019	2071.25	1152.15
2.07297	2.40793	0.00019	2072.97	1151.2
2.07469	2.40785	0.00019	2074.69	1150.24
2.07641	2.40778	0.00019	2076.41	1149.29
2.07814	2.40771	0.00019	2078.14	1148.33
2.07987	2.40764	0.00019	2079.87	1147.38
2.0816	2.40756	0.00019	2081.6	1146.43
2.08333	2.40749	0.00019	2083.33	1145.47
2.08507	2.40742	0.00019	2085.07	1144.52
2.08681	2.40734	0.00019	2086.81	1143.56
2.08855	2.40727	0.00019	2088.55	1142.61
2.0903	2.4072	0.00019	2090.3	1141.65
2.09205	2.40712	0.00019	2092.05	1140.7
2.0938	2.40705	0.00019	2093.8	1139.75
2.09556	2.40698	0.00019	2095.56	1138.79
2.09732	2.4069	0.00019	2097.32	1137.83
2.09908	2.40683	0.00019	2099.08	1136.88
2.10084	2.40676	0.00019	2100.84	1135.93
2.10261	2.40668	0.00019	2102.61	1134.97
2.10438	2.40661	0.00019	2104.38	1134.02
2.10615	2.40653	0.00019	2106.15	1133.06
2.10793	2.40646	0.0002	2107.93	1191.69
2.1097	2.40638	0.0002	2109.7	1190.69
2.11149	2.40631	0.0002	2111.49	1189.68
2.11327	2.40623	0.0002	2113.27	1188.68
2.11506	2.40616	0.0002	2115.06	1187.67
2.11685	2.40608	0.0002	2116.85	1186.67
2.11864	2.40601	0.0002	2118.64	1185.67
2.12044	2.40593	0.0002	2120.44	1184.66
2.12224	2.40586	0.0002	2122.24	1183.66
2.12404	2.40578	0.0002	2124.04	1182.65
2.12585	2.40571	0.0002	2125.85	1181.64
2.12766	2.40563	0.0002	2127.66	1180.64
2.12947	2.40556	0.0002	2129.47	1179.64
2.13129	2.40548	0.0002	2131.29	1178.63
2.13311	2.4054	0.0002	2133.11	1177.62
2.13493	2.40533	0.0002	2134.93	1176.62
2.13675	2.40525	0.0002	2136.75	1175.62
2.13858	2.40518	0.0002	2138.58	1174.61
2.14041	2.4051	0.0002	2140.41	1173.61
2.14225	2.40502	0.0002	2142.25	1172.6
2.14408	2.40495	0.0002	2144.08	1171.6
2.14592	2.40487	0.0002	2145.92	1170.59
2.14777	2.40479	0.00021	2147.77	1228.06
2.14961	2.40472	0.00021	2149.61	1227.01
2.15146	2.40464	0.00021	2151.46	1225.96
2.15332	2.40456	0.00021	2153.32	1224.9
2.15517	2.40448	0.00021	2155.17	1223.85
2.15703	2.40441	0.00021	2157.03	1222.79
2.15889	2.40433	0.00021	2158.89	1221.74
2.16076	2.40425	0.00021	2160.76	1220.68
2.16263	2.40417	0.00021	2162.63	1219.63
2.1645	2.40409	0.00021	2164.5	1218.57
2.16638	2.40402	0.00021	2166.38	1217.51
2.16826	2.40394	0.00021	2168.26	1216.46
2.17014	2.40386	0.00021	2170.14	1215.41
2.17202	2.40378	0.00021	2172.02	1214.35
2.17391	2.4037	0.00021	2173.91	1213.3
2.17581	2.40362	0.00021	2175.81	1212.24
2.1777	2.40354	0.00021	2177.7	1211.19
2.1796	2.40346	0.00021	2179.6	1210.13
2.1815	2.40339	0.00021	2181.5	1209.08
2.18341	2.40331	0.00021	2183.41	1208.02
2.18531	2.40323	0.00021	2185.31	1206.97
2.18723	2.40315	0.00022	2187.23	1263.33
2.18914	2.40307	0.00022	2189.14	1262.23
2.19106	2.40299	0.00022	2191.06	1261.12
2.19298	2.40291	0.00022	2192.98	1260.02
2.19491	2.40283	0.00022	2194.91	1258.91
2.19684	2.40275	0.00022	2196.84	1257.81
2.19877	2.40267	0.00022	2198.77	1256.7
2.2007	2.40259	0.00022	2200.7	1255.6
2.20264	2.4025	0.00022	2202.64	1254.49
2.20459	2.40242	0.00022	2204.59	1253.38
2.20653	2.40234	0.00022	2206.53	1252.28
2.20848	2.40226	0.00022	2208.48	1251.18
2.21043	2.40218	0.00022	2210.43	1250.07
2.21239	2.4021	0.00022	2212.39	1248.97
2.21435	2.40202	0.00022	2214.35	1247.86
2.21631	2.40194	0.00022	2216.31	1246.76
2.21828	2.40185	0.00022	2218.28	1245.65
2.22025	2.40177	0.00022	2220.25	1244.54
2.22222	2.40169	0.00022	2222.22	1243.44
2.2242	2.40161	0.00023	2224.2	1298.8
2.22618	2.40152	0.00023	2226.18	1297.65
2.22816	2.40144	0.00023	2228.16	1296.5
2.23015	2.40136	0.00023	2230.15	1295.34
2.23214	2.40128	0.00023	2232.14	1294.18
2.23414	2.40119	0.00023	2234.14	1293.03
2.23614	2.40111	0.00023	2236.14	1291.87
2.23814	2.40103	0.00023	2238.14	1290.71
2.24014	2.40094	0.00023	2240.14	1289.56
2.24215	2.40086	0.00023	2242.15	1288.41
2.24417	2.40077	0.00023	2244.17	1287.25
2.24618	2.40069	0.00023	2246.18	1286.09
2.2482	2.40061	0.00023	2248.2	1284.94
2.25023	2.40052	0.00023	2250.23	1283.78
2.25225	2.40044	0.00023	2252.25	1282.63
2.25428	2.40035	0.00023	2254.28	1281.47
2.25632	2.40027	0.00023	2256.32	1280.31
2.25836	2.40018	0.00024	2258.36	1334.77
2.2604	2.4001	0.00024	2260.4	1333.57
2.26244	2.40001	0.00024	2262.44	1332.37
2.26449	2.39993	0.00024	2264.49	1331.16
2.26655	2.39984	0.00024	2266.55	1329.95
2.2686	2.39976	0.00024	2268.6	1328.75
2.27066	2.39967	0.00024	2270.66	1327.54
2.27273	2.39958	0.00024	2272.73	1326.33
2.2748	2.3995	0.00024	2274.8	1325.13
2.27687	2.39941	0.00024	2276.87	1323.92
2.27894	2.39933	0.00024	2278.94	1322.72
2.28102	2.39924	0.00024	2281.02	1321.51
2.28311	2.39915	0.00024	2283.11	1320.3
2.28519	2.39907	0.00024	2285.19	1319.1
2.28728	2.39898	0.00024	2287.28	1317.9
2.28938	2.39889	0.00024	2289.38	1316.69
2.29148	2.3988	0.00024	2291.48	1315.48
2.29358	2.39872	0.00025	2293.58	1369.04
2.29568	2.39863	0.00025	2295.68	1367.79
2.29779	2.39854	0.00025	2297.79	1366.53
2.29991	2.39845	0.00025	2299.91	1365.27
2.30203	2.39836	0.00025	2302.03	1364.01
2.30415	2.39827	0.00025	2304.15	1362.76
2.30627	2.39819	0.00025	2306.27	1361.51
2.3084	2.3981	0.00025	2308.4	1360.25
2.31054	2.39801	0.00025	2310.54	1358.99
2.31267	2.39792	0.00025	2312.67	1357.74
2.31481	2.39783	0.00025	2314.81	1356.48
2.31696	2.39774	0.00025	2316.96	1355.22
2.31911	2.39765	0.00025	2319.11	1353.97
2.32126	2.39756	0.00025	2321.26	1352.71
2.32342	2.39747	0.00025	2323.42	1351.46
2.32558	2.39738	0.00025	2325.58	1350.2
2.32775	2.39729	0.00026	2327.75	1402.9
2.32992	2.3972	0.00026	2329.92	1401.59
2.33209	2.39711	0.00026	2332.09	1400.29
2.33427	2.39702	0.00026	2334.27	1398.98
2.33645	2.39692	0.00026	2336.45	1397.68
2.33863	2.39683	0.00026	2338.63	1396.37
2.34082	2.39674	0.00026	2340.82	1395.07
2.34302	2.39665	0.00026	2343.02	1393.76
2.34522	2.39656	0.00026	2345.22	1392.45
2.34742	2.39647	0.00026	2347.42	1391.14
2.34962	2.39637	0.00026	2349.62	1389.84
2.35183	2.39628	0.00026	2351.83	1388.54
2.35405	2.39619	0.00026	2354.05	1387.23
2.35627	2.39609	0.00026	2356.27	1385.92
2.35849	2.396	0.00027	2358.49	1437.87
2.36072	2.39591	0.00027	2360.72	1436.51
2.36295	2.39581	0.00027	2362.95	1435.16
2.36518	2.39572	0.00027	2365.18	1433.8
2.36742	2.39563	0.00027	2367.42	1432.45
2.36967	2.39553	0.00027	2369.67	1431.09
2.37192	2.39544	0.00027	2371.92	1429.73
2.37417	2.39534	0.00027	2374.17	1428.37
2.37643	2.39525	0.00027	2376.43	1427.01
2.37869	2.39515	0.00027	2378.69	1425.66
2.38095	2.39506	0.00027	2380.95	1424.31
2.38322	2.39496	0.00027	2383.22	1422.95
2.3855	2.39487	0.00027	2385.5	1421.59
2.38777	2.39477	0.00027	2387.77	1420.24
2.39006	2.39468	0.00028	2390.06	1471.43
2.39234	2.39458	0.00028	2392.34	1470.03
2.39464	2.39448	0.00028	2394.64	1468.61
2.39693	2.39439	0.00028	2396.93	1467.21
2.39923	2.39429	0.00028	2399.23	1465.8
2.40154	2.39419	0.00028	2401.54	1464.39
2.40385	2.3941	0.00028	2403.85	1462.99
2.40616	2.394	0.00028	2406.16	1461.58
2.40848	2.3939	0.00028	2408.48	1460.17
2.4108	2.3938	0.00028	2410.8	1458.77
2.41313	2.3937	0.00028	2413.13	1457.36
2.41546	2.39361	0.00028	2415.46	1455.95
2.41779	2.39351	0.00028	2417.79	1454.55
2.42014	2.39341	0.00029	2420.14	1505.04
2.42248	2.39331	0.00029	2422.48	1503.58
2.42483	2.39321	0.00029	2424.83	1502.13
2.42718	2.39311	0.00029	2427.18	1500.67
2.42954	2.39301	0.00029	2429.54	1499.21
2.43191	2.39291	0.00029	2431.91	1497.75
2.43427	2.39281	0.00029	2434.27	1496.3
2.43665	2.39271	0.00029	2436.65	1494.84
2.43902	2.39261	0.00029	2439.02	1493.39
2.44141	2.39251	0.00029	2441.41	1491.92
2.44379	2.39241	0.00029	2443.79	1490.47
2.44618	2.39231	0.00029	2446.18	1489.02
2.44858	2.39221	0.00029	2448.58	1487.56
2.45098	2.3921	0.0003	2450.98	1537.34
2.45339	2.392	0.0003	2453.39	1535.83
2.4558	2.3919	0.0003	2455.8	1534.33
2.45821	2.3918	0.0003	2458.21	1532.82
2.46063	2.3917	0.0003	2460.63	1531.32
2.46305	2.39159	0.0003	2463.05	1529.81
2.46548	2.39149	0.0003	2465.48	1528.3
2.46792	2.39139	0.0003	2467.92	1526.79
2.47036	2.39128	0.0003	2470.36	1525.28
2.4728	2.39118	0.0003	2472.8	1523.78
2.47525	2.39107	0.0003	2475.25	1522.27
2.4777	2.39097	0.0003	2477.7	1520.77
2.48016	2.39087	0.00031	2480.16	1569.9
2.48262	2.39076	0.00031	2482.62	1568.34
2.48509	2.39066	0.00031	2485.09	1566.78
2.48756	2.39055	0.00031	2487.56	1565.23
2.49004	2.39045	0.00031	2490.04	1563.67
2.49252	2.39034	0.00031	2492.52	1562.11
2.49501	2.39023	0.00031	2495.01	1560.55
2.4975	2.39013	0.00031	2497.5	1559
2.5	2.39002	0.00031	2500	1557.44
2.5025	2.38991	0.00031	2502.5	1555.88
2.50501	2.38981	0.00031	2505.01	1554.33
2.50752	2.3897	0.00032	2507.52	1602.86
2.51004	2.38959	0.00032	2510.04	1601.25
2.51256	2.38948	0.00032	2512.56	1599.64
2.51509	2.38938	0.00032	2515.09	1598.03
2.51762	2.38927	0.00032	2517.62	1596.43
2.52016	2.38916	0.00032	2520.16	1594.82
2.5227	2.38905	0.00032	2522.7	1593.21
2.52525	2.38894	0.00032	2525.25	1591.6
2.52781	2.38883	0.00032	2527.81	1589.99
2.53036	2.38872	0.00032	2530.36	1588.39
2.53293	2.38861	0.00032	2532.93	1586.78
2.5355	2.3885	0.00033	2535.5	1634.71
2.53807	2.38839	0.00033	2538.07	1633.05
2.54065	2.38828	0.00033	2540.65	1631.39
2.54323	2.38817	0.00033	2543.23	1629.74
2.54582	2.38806	0.00033	2545.82	1628.08
2.54842	2.38795	0.00033	2548.42	1626.42
2.55102	2.38783	0.00033	2551.02	1624.76
2.55363	2.38772	0.00033	2553.63	1623.1
2.55624	2.38761	0.00033	2556.24	1621.44
2.55885	2.3875	0.00033	2558.85	1619.79
2.56148	2.38738	0.00034	2561.48	1667.16
2.5641	2.38727	0.00034	2564.1	1665.46
2.56674	2.38716	0.00034	2566.74	1663.74
2.56937	2.38704	0.00034	2569.37	1662.04
2.57202	2.38693	0.00034	2572.02	1660.33
2.57467	2.38681	0.00034	2574.67	1658.62
2.57732	2.3867	0.00034	2577.32	1656.91
2.57998	2.38658	0.00034	2579.98	1655.21
2.58264	2.38647	0.00034	2582.64	1653.5
2.58532	2.38635	0.00034	2585.32	1651.79
2.58799	2.38624	0.00035	2587.99	1698.62
2.59067	2.38612	0.00035	2590.67	1696.86
2.59336	2.386	0.00035	2593.36	1695.1
2.59605	2.38589	0.00035	2596.05	1693.34
2.59875	2.38577	0.00035	2598.75	1691.58
2.60146	2.38565	0.00035	2601.46	1689.82
2.60417	2.38554	0.00035	2604.17	1688.06
2.60688	2.38542	0.00035	2606.88	1686.31
2.6096	2.3853	0.00035	2609.6	1684.55
2.61233	2.38518	0.00036	2612.33	1730.87
2.61506	2.38506	0.00036	2615.06	1729.06
2.6178	2.38494	0.00036	2617.8	1727.25
2.62055	2.38482	0.00036	2620.55	1725.44
2.62329	2.3847	0.00036	2623.29	1723.64
2.62605	2.38458	0.00036	2626.05	1721.83
2.62881	2.38446	0.00036	2628.81	1720.02
2.63158	2.38434	0.00036	2631.58	1718.21
2.63435	2.38422	0.00036	2634.35	1716.4
2.63713	2.3841	0.00037	2637.13	1762.22
2.63992	2.38398	0.00037	2639.92	1760.36
2.64271	2.38385	0.00037	2642.71	1758.5
2.6455	2.38373	0.00037	2645.5	1756.64
2.64831	2.38361	0.00037	2648.31	1754.78
2.65111	2.38348	0.00037	2651.11	1752.93
2.65393	2.38336	0.00037	2653.93	1751.06
2.65675	2.38324	0.00037	2656.75	1749.2
2.65957	2.38311	0.00037	2659.57	1747.35
2.66241	2.38299	0.00038	2662.41	1792.66
2.66525	2.38286	0.00038	2665.25	1790.75
2.66809	2.38274	0.00038	2668.09	1788.85
2.67094	2.38261	0.00038	2670.94	1786.94
2.6738	2.38249	0.00038	2673.8	1785.03
2.67666	2.38236	0.00038	2676.66	1783.12
2.67953	2.38223	0.00038	2679.53	1781.21
2.6824	2.38211	0.00038	2682.4	1779.3
2.68528	2.38198	0.00039	2685.28	1824.17
2.68817	2.38185	0.00039	2688.17	1822.21
2.69107	2.38172	0.00039	2691.07	1820.24
2.69397	2.3816	0.00039	2693.97	1818.28
2.69687	2.38147	0.00039	2696.87	1816.33
2.69978	2.38134	0.00039	2699.78	1814.37
2.7027	2.38121	0.00039	2702.7	1812.41
2.70563	2.38108	0.00039	2705.63	1810.45
2.70856	2.38095	0.0004	2708.56	1854.86
2.7115	2.38082	0.0004	2711.5	1852.85
2.71444	2.38069	0.0004	2714.44	1850.84
2.71739	2.38056	0.0004	2717.39	1848.83
2.72035	2.38042	0.0004	2720.35	1846.82
2.72331	2.38029	0.0004	2723.31	1844.81
2.72628	2.38016	0.0004	2726.28	1842.8
2.72926	2.38003	0.0004	2729.26	1840.79
2.73224	2.37989	0.00041	2732.24	1884.75
2.73523	2.37976	0.00041	2735.23	1882.69
2.73823	2.37963	0.00041	2738.23	1880.63
2.74123	2.37949	0.00041	2741.23	1878.57
2.74424	2.37936	0.00041	2744.24	1876.51
2.74725	2.37922	0.00041	2747.25	1874.46
2.75028	2.37909	0.00041	2750.28	1872.39
2.7533	2.37895	0.00042	2753.3	1915.96
2.75634	2.37882	0.00042	2756.34	1913.84
2.75938	2.37868	0.00042	2759.38	1911.73
2.76243	2.37854	0.00042	2762.43	1909.62
2.76549	2.3784	0.00042	2765.49	1907.51
2.76855	2.37827	0.00042	2768.55	1905.4
2.77162	2.37813	0.00042	2771.62	1903.29
2.77469	2.37799	0.00043	2774.69	1946.45
2.77778	2.37785	0.00043	2777.78	1944.29
2.78087	2.37771	0.00043	2780.87	1942.13
2.78396	2.37757	0.00043	2783.96	1939.97
2.78707	2.37743	0.00043	2787.07	1937.81
2.79018	2.37729	0.00043	2790.18	1935.65
2.7933	2.37715	0.00043	2793.3	1933.48
2.79642	2.37701	0.00044	2796.42	1976.24
2.79955	2.37687	0.00044	2799.55	1974.03
2.80269	2.37672	0.00044	2802.69	1971.82
2.80584	2.37658	0.00044	2805.84	1969.61
2.80899	2.37644	0.00044	2808.99	1967.4
2.81215	2.37629	0.00044	2812.15	1965.19
2.81532	2.37615	0.00044	2815.32	1962.97
2.81849	2.376	0.00045	2818.49	2005.33
2.82167	2.37586	0.00045	2821.67	2003.07
2.82486	2.37571	0.00045	2824.86	2000.81
2.82805	2.37557	0.00045	2828.05	1998.55
2.83126	2.37542	0.00045	2831.26	1996.28
2.83447	2.37528	0.00045	2834.47	1994.02
2.83768	2.37513	0.00046	2837.68	2036.03
2.84091	2.37498	0.00046	2840.91	2033.71
2.84414	2.37483	0.00046	2844.14	2031.4
2.84738	2.37468	0.00046	2847.38	2029.09
2.85063	2.37454	0.00046	2850.63	2026.78
2.85388	2.37439	0.00046	2853.88	2024.47
2.85714	2.37424	0.00047	2857.14	2066.12
2.86041	2.37409	0.00047	2860.41	2063.76
2.86369	2.37393	0.00047	2863.69	2061.4
2.86697	2.37378	0.00047	2866.97	2059.04
2.87026	2.37363	0.00047	2870.26	2056.68
2.87356	2.37348	0.00047	2873.56	2054.32
2.87687	2.37333	0.00048	2876.87	2095.61
2.88018	2.37317	0.00048	2880.18	2093.2
2.88351	2.37302	0.00048	2883.51	2090.79
2.88684	2.37287	0.00048	2886.84	2088.37
2.89017	2.37271	0.00048	2890.17	2085.97
2.89352	2.37256	0.00048	2893.52	2083.55
2.89687	2.3724	0.00049	2896.87	2124.5
2.90023	2.37224	0.00049	2900.23	2122.04
2.9036	2.37209	0.00049	2903.6	2119.58
2.90698	2.37193	0.00049	2906.98	2117.11
2.91036	2.37177	0.00049	2910.36	2114.65
2.91375	2.37161	0.00049	2913.75	2112.19
2.91715	2.37146	0.0005	2917.15	2152.79
2.92056	2.3713	0.0005	2920.56	2150.27
2.92398	2.37114	0.0005	2923.98	2147.76
2.9274	2.37098	0.0005	2927.4	2145.25
2.93083	2.37082	0.0005	2930.83	2142.74
2.93427	2.37065	0.0005	2934.27	2140.23
2.93772	2.37049	0.00051	2937.72	2180.47
2.94118	2.37033	0.00051	2941.18	2177.9
2.94464	2.37017	0.00051	2944.64	2175.34
2.94811	2.37	0.00051	2948.11	2172.78
2.95159	2.36984	0.00051	2951.59	2170.22
2.95508	2.36968	0.00052	2955.08	2210.16
2.95858	2.36951	0.00052	2958.58	2207.55
2.96209	2.36935	0.00052	2962.09	2204.93
2.9656	2.36918	0.00052	2965.6	2202.32
2.96912	2.36901	0.00052	2969.12	2199.71
2.97265	2.36885	0.00053	2972.65	2239.35
2.97619	2.36868	0.00053	2976.19	2236.69
2.97974	2.36851	0.00053	2979.74	2234.02
2.98329	2.36834	0.00053	2983.29	2231.36
2.98686	2.36817	0.00053	2986.86	2228.7
2.99043	2.368	0.00054	2990.43	2268.04
2.99401	2.36783	0.00054	2994.01	2265.32
2.9976	2.36766	0.00054	2997.6	2262.61
3.0012	2.36749	0.00054	3001.2	2259.9
3.00481	2.36732	0.00054	3004.81	2257.18
3.00842	2.36715	0.00055	3008.42	2296.22
3.01205	2.36697	0.00055	3012.05	2293.45
3.01568	2.3668	0.00055	3015.68	2290.69
3.01932	2.36662	0.00055	3019.32	2287.93
3.02297	2.36645	0.00055	3022.97	2285.17
3.02663	2.36627	0.00056	3026.63	2323.9
3.0303	2.3661	0.00056	3030.3	2321.09
3.03398	2.36592	0.00056	3033.98	2318.28
3.03767	2.36574	0.00056	3037.67	2315.46
3.04136	2.36556	0.00056	3041.36	2312.65
3.04507	2.36539	0.00057	3045.07	2351.08
3.04878	2.36521	0.00057	3048.78	2348.22
3.0525	2.36503	0.00057	3052.5	2345.36
3.05623	2.36485	0.00057	3056.23	2342.49
3.05998	2.36467	0.00058	3059.98	2380.67
3.06373	2.36448	0.00058	3063.73	2377.76
3.06748	2.3643	0.00058	3067.48	2374.85
3.07125	2.36412	0.00058	3071.25	2371.93
3.07503	2.36393	0.00058	3075.03	2369.02
3.07882	2.36375	0.00059	3078.82	2406.9
3.08261	2.36357	0.00059	3082.61	2403.94
3.08642	2.36338	0.00059	3086.42	2400.97
3.09023	2.36319	0.00059	3090.23	2398.01
3.09406	2.36301	0.0006	3094.06	2435.63
3.09789	2.36282	0.0006	3097.89	2432.62
3.10174	2.36263	0.0006	3101.74	2429.6
3.10559	2.36244	0.0006	3105.59	2426.59
3.10945	2.36225	0.00061	3109.45	2463.97
3.11333	2.36206	0.00061	3113.33	2460.9
3.11721	2.36187	0.00061	3117.21	2457.84
3.1211	2.36168	0.00061	3121.1	2454.78
3.125	2.36149	0.00061	3125	2451.71
3.12891	2.36129	0.00062	3128.91	2488.79
3.13283	2.3611	0.00062	3132.83	2485.68
3.13676	2.36091	0.00062	3136.76	2482.56
3.1407	2.36071	0.00062	3140.7	2479.45
3.14465	2.36052	0.00063	3144.65	2516.27
3.14861	2.36032	0.00063	3148.61	2513.11
3.15259	2.36012	0.00063	3152.59	2509.94
3.15657	2.35993	0.00063	3156.57	2506.77
3.16056	2.35973	0.00064	3160.56	2543.35
3.16456	2.35953	0.00064	3164.56	2540.13
3.16857	2.35933	0.00064	3168.57	2536.92
3.17259	2.35913	0.00064	3172.59	2533.7
3.17662	2.35893	0.00065	3176.62	2570.03
3.18066	2.35872	0.00065	3180.66	2566.76
3.18471	2.35852	0.00065	3184.71	2563.5
3.18878	2.35832	0.00066	3188.78	2599.61
3.19285	2.35811	0.00066	3192.85	2596.3
3.19693	2.35791	0.00066	3196.93	2592.99
3.20102	2.3577	0.00066	3201.02	2589.67
3.20513	2.35749	0.00067	3205.13	2625.54
3.20924	2.35729	0.00067	3209.24	2622.18
3.21337	2.35708	0.00067	3213.37	2618.81
3.2175	2.35687	0.00067	3217.5	2615.45
3.22165	2.35666	0.00068	3221.65	2651.06
3.22581	2.35645	0.00068	3225.81	2647.65
3.22997	2.35624	0.00068	3229.97	2644.24
3.23415	2.35603	0.00069	3234.15	2679.65
3.23834	2.35581	0.00069	3238.34	2676.19
3.24254	2.3556	0.00069	3242.54	2672.72
3.24675	2.35539	0.00069	3246.75	2669.25
3.25098	2.35517	0.0007	3250.98	2704.42
3.25521	2.35495	0.0007	3255.21	2700.9
3.25945	2.35474	0.0007	3259.45	2697.39
3.26371	2.35452	0.00071	3263.71	2732.35
3.26797	2.3543	0.00071	3267.97	2728.79
3.27225	2.35408	0.00071	3272.25	2725.22
3.27654	2.35386	0.00072	3276.54	2759.98
3.28084	2.35364	0.00072	3280.84	2756.37
3.28515	2.35342	0.00072	3285.15	2752.75
3.28947	2.3532	0.00072	3289.47	2749.14
3.29381	2.35297	0.00073	3293.81	2783.65
3.29815	2.35275	0.00073	3298.15	2779.98
3.30251	2.35252	0.00073	3302.51	2776.31
3.30688	2.3523	0.00074	3306.88	2810.63
3.31126	2.35207	0.00074	3311.26	2806.91
3.31565	2.35184	0.00074	3315.65	2803.19
3.32005	2.35161	0.00075	3320.05	2837.31
3.32447	2.35138	0.00075	3324.47	2833.53
3.32889	2.35115	0.00075	3328.89	2829.77
3.33333	2.35092	0.00076	3333.33	2863.68
3.33778	2.35069	0.00076	3337.78	2859.86
3.34225	2.35045	0.00076	3342.25	2856.04
3.34672	2.35022	0.00077	3346.72	2889.75
3.35121	2.34998	0.00077	3351.21	2885.88
3.3557	2.34975	0.00077	3355.7	2882.02
3.36022	2.34951	0.00078	3360.22	2915.52
3.36474	2.34927	0.00078	3364.74	2911.61
3.36927	2.34903	0.00078	3369.27	2907.69
3.37382	2.34879	0.00079	3373.82	2941
3.37838	2.34855	0.00079	3378.38	2937.03
3.38295	2.34831	0.00079	3382.95	2933.06
3.38753	2.34807	0.0008	3387.53	2966.17
3.39213	2.34783	0.0008	3392.13	2962.15
3.39674	2.34758	0.0008	3396.74	2958.13
3.40136	2.34734	0.00081	3401.36	2991.04
3.40599	2.34709	0.00081	3405.99	2986.97
3.41064	2.34684	0.00082	3410.64	3019.73
3.4153	2.34659	0.00082	3415.3	3015.61
3.41997	2.34634	0.00082	3419.97	3011.49
3.42466	2.34609	0.00083	3424.66	3044.04
3.42936	2.34584	0.00083	3429.36	3039.87
3.43407	2.34559	0.00083	3434.07	3035.7
3.43879	2.34533	0.00084	3438.79	3068.06
3.44353	2.34508	0.00084	3443.53	3063.83
3.44828	2.34482	0.00085	3448.28	3096.04
3.45304	2.34457	0.00085	3453.04	3091.77
3.45781	2.34431	0.00085	3457.81	3087.5
3.4626	2.34405	0.00086	3462.6	3119.51
3.46741	2.34379	0.00086	3467.41	3115.18
3.47222	2.34353	0.00086	3472.22	3110.86
3.47705	2.34327	0.00087	3477.05	3142.66
3.48189	2.343	0.00087	3481.89	3138.3
3.48675	2.34274	0.00088	3486.75	3169.94
3.49162	2.34247	0.00088	3491.62	3165.52
3.4965	2.34221	0.00088	3496.5	3161.1
3.5014	2.34194	0.00089	3501.4	3192.55
3.50631	2.34167	0.00089	3506.31	3188.08
3.51124	2.3414	0.0009	3511.24	3219.38
3.51617	2.34113	0.0009	3516.17	3214.86
3.52113	2.34086	0.00091	3521.13	3246
3.52609	2.34058	0.00091	3526.09	3241.44
3.53107	2.34031	0.00091	3531.07	3236.87
3.53607	2.34003	0.00092	3536.07	3267.81
3.54108	2.33975	0.00092	3541.08	3263.19
3.5461	2.33948	0.00093	3546.1	3293.98
3.55114	2.3392	0.00093	3551.14	3289.31
3.55619	2.33892	0.00094	3556.19	3319.96
3.56125	2.33863	0.00094	3561.25	3315.24
3.56633	2.33835	0.00094	3566.33	3310.52
3.57143	2.33807	0.00095	3571.43	3340.96
3.57654	2.33778	0.00095	3576.54	3336.19
3.58166	2.3375	0.00096	3581.66	3366.48
3.5868	2.33721	0.00096	3586.8	3361.66
3.59195	2.33692	0.00097	3591.95	3391.81
3.59712	2.33663	0.00097	3597.12	3386.93
3.60231	2.33634	0.00098	3602.31	3416.92
3.6075	2.33604	0.00098	3607.5	3412
3.61272	2.33575	0.00099	3612.72	3441.84
3.61795	2.33546	0.00099	3617.95	3436.86
3.62319	2.33516	0.001	3623.19	3466.56
3.62845	2.33486	0.001	3628.45	3461.53
3.63372	2.33456	0.00101	3633.72	3491.08
3.63901	2.33426	0.00101	3639.01	3486
3.64431	2.33396	0.00102	3644.31	3515.4
3.64964	2.33366	0.00102	3649.64	3510.26
3.65497	2.33335	0.00103	3654.97	3539.51
3.66032	2.33304	0.00103	3660.32	3534.34
3.66569	2.33274	0.00104	3665.69	3563.42
3.67107	2.33243	0.00104	3671.07	3558.2
3.67647	2.33212	0.00105	3676.47	3587.14
3.68189	2.33181	0.00105	3681.89	3581.86
3.68732	2.33149	0.00106	3687.32	3610.64
3.69276	2.33118	0.00106	3692.76	3605.33
3.69822	2.33086	0.00107	3698.22	3633.96
3.7037	2.33055	0.00107	3703.7	3628.59
3.7092	2.33023	0.00108	3709.2	3657.07
3.71471	2.32991	0.00108	3714.71	3651.64
3.72024	2.32959	0.00109	3720.24	3679.98
3.72578	2.32926	0.0011	3725.78	3708.22
3.73134	2.32894	0.0011	3731.34	3702.69
3.73692	2.32861	0.00111	3736.92	3730.77
3.74251	2.32829	0.00111	3742.51	3725.2
3.74813	2.32796	0.00112	3748.13	3753.12
3.75375	2.32763	0.00112	3753.75	3747.51
3.7594	2.3273	0.00113	3759.4	3775.28
3.76506	2.32696	0.00114	3765.06	3802.97
3.77074	2.32663	0.00114	3770.74	3797.24
3.77644	2.32629	0.00115	3776.44	3824.77
3.78215	2.32595	0.00115	3782.15	3818.99
3.78788	2.32561	0.00116	3787.88	3846.37
3.79363	2.32527	0.00117	3793.63	3873.65
3.79939	2.32493	0.00117	3799.39	3867.78
3.80518	2.32459	0.00118	3805.18	3894.9
3.81098	2.32424	0.00118	3810.98	3888.97
3.81679	2.32389	0.00119	3816.79	3915.96
3.82263	2.32354	0.0012	3822.63	3942.84
3.82848	2.32319	0.0012	3828.48	3936.81
3.83436	2.32284	0.00121	3834.36	3963.53
3.84025	2.32249	0.00122	3840.25	3990.16
3.84615	2.32213	0.00122	3846.15	3984.04
3.85208	2.32177	0.00123	3852.08	4010.51
3.85802	2.32141	0.00124	3858.02	4036.89
3.86399	2.32105	0.00124	3863.99	4030.65
3.86997	2.32069	0.00125	3869.97	4056.88
3.87597	2.32032	0.00126	3875.97	4083
3.88199	2.31996	0.00126	3881.99	4076.67
3.88802	2.31959	0.00127	3888.02	4102.65
3.89408	2.31922	0.00128	3894.08	4128.52
3.90016	2.31885	0.00128	3900.16	4122.09
3.90625	2.31848	0.00129	3906.25	4147.81
3.91236	2.3181	0.0013	3912.36	4173.44
3.9185	2.31772	0.0013	3918.5	4166.9
3.92465	2.31735	0.00131	3924.65	4192.37
3.93082	2.31696	0.00132	3930.82	4217.75
3.93701	2.31658	0.00133	3937.01	4243.02
3.94322	2.3162	0.00133	3943.22	4236.33
3.94945	2.31581	0.00134	3949.45	4261.45
3.9557	2.31542	0.00135	3955.7	4286.47
3.96197	2.31503	0.00136	3961.97	4311.39
3.96825	2.31464	0.00136	3968.25	4304.57
3.97456	2.31425	0.00137	3974.56	4329.33
3.98089	2.31385	0.00138	3980.89	4354
3.98724	2.31345	0.00139	3987.24	4378.57
3.99361	2.31305	0.00139	3993.61	4371.58
4	2.31265	0.0014	4000	4396
4.00641	2.31225	0.00141	4006.41	4420.32
4.01284	2.31184	0.00142	4012.84	4444.53
4.01929	2.31144	0.00143	4019.29	4468.65
4.02576	2.31103	0.00143	4025.76	4461.47
4.03226	2.31061	0.00144	4032.26	4485.43
4.03877	2.3102	0.00145	4038.77	4509.29
4.04531	2.30978	0.00146	4045.31	4533.05
4.05186	2.30937	0.00147	4051.86	4556.72
4.05844	2.30895	0.00148	4058.44	4580.28
4.06504	2.30852	0.00148	4065.04	4572.85
4.07166	2.3081	0.00149	4071.66	4596.26
4.0783	2.30767	0.0015	4078.3	4619.57
4.08497	2.30724	0.00151	4084.97	4642.78
4.09165	2.30681	0.00152	4091.65	4665.89
4.09836	2.30638	0.00153	4098.36	4688.9
4.10509	2.30594	0.00154	4105.09	4711.81
4.11184	2.3055	0.00155	4111.84	4734.62
4.11862	2.30506	0.00155	4118.62	4726.83
4.12541	2.30462	0.00156	4125.41	4749.49
4.13223	2.30418	0.00157	4132.23	4772.05
4.13907	2.30373	0.00158	4139.07	4794.51
4.14594	2.30328	0.00159	4145.94	4816.86
4.15282	2.30283	0.0016	4152.82	4839.12
4.15973	2.30238	0.00161	4159.73	4861.28
4.16667	2.30192	0.00162	4166.67	4883.32
4.17362	2.30146	0.00163	4173.62	4905.29
4.1806	2.301	0.00164	4180.6	4927.14
4.1876	2.30053	0.00165	4187.6	4948.9
4.19463	2.30007	0.00166	4194.63	4970.55
4.20168	2.2996	0.00167	4201.68	4992.1
4.20875	2.29913	0.00168	4208.75	5013.56
4.21585	2.29866	0.00169	4215.85	5034.9
4.22297	2.29818	0.0017	4222.97	5056.16
4.23012	2.2977	0.00171	4230.12	5077.3
4.23729	2.29722	0.00172	4237.29	5098.35
4.24448	2.29674	0.00173	4244.48	5119.31
4.2517	2.29625	0.00174	4251.7	5140.16
4.25894	2.29576	0.00175	4258.94	5160.91
4.26621	2.29527	0.00177	4266.21	5211
4.2735	2.29477	0.00178	4273.5	5231.5
4.28082	2.29428	0.00179	4280.82	5251.89
4.28816	2.29378	0.0018	4288.16	5272.19
4.29553	2.29327	0.00181	4295.53	5292.39
4.30293	2.29277	0.00182	4302.93	5312.47
4.31034	2.29226	0.00183	4310.34	5332.48
4.31779	2.29175	0.00184	4317.79	5352.37
4.32526	2.29124	0.00186	4325.26	5401.2
4.33276	2.29072	0.00187	4332.76	5420.84
4.34028	2.2902	0.00188	4340.28	5440.39
4.34783	2.28968	0.00189	4347.83	5459.83
4.3554	2.28915	0.0019	4355.4	5479.18
4.363	2.28862	0.00192	4363	5527.21
4.37063	2.28809	0.00193	4370.63	5546.29
4.37828	2.28756	0.00194	4378.28	5565.29
4.38596	2.28702	0.00195	4385.96	5584.18
4.39367	2.28648	0.00197	4393.67	5631.56
4.40141	2.28594	0.00198	4401.41	5650.19
4.40917	2.28539	0.00199	4409.17	5668.73
4.41696	2.28484	0.00201	4416.96	5715.61
4.42478	2.28429	0.00202	4424.78	5733.89
4.43262	2.28374	0.00203	4432.62	5752.08
4.4405	2.28318	0.00205	4440.5	5798.45
4.4484	2.28262	0.00206	4448.4	5816.38
4.45633	2.28205	0.00207	4456.33	5834.22
4.46429	2.28148	0.00209	4464.29	5880.08
4.47227	2.28091	0.0021	4472.27	5897.68
4.48029	2.28034	0.00212	4480.29	5943.19
4.48833	2.27976	0.00213	4488.33	5960.52
4.4964	2.27918	0.00214	4496.4	5977.76
4.5045	2.27859	0.00216	4504.5	6022.78
4.51264	2.278	0.00217	4512.64	6039.75
4.5208	2.27741	0.00219	4520.8	6084.41
4.52899	2.27682	0.0022	4528.99	6101.14
4.53721	2.27622	0.00222	4537.21	6145.45
4.54545	2.27562	0.00223	4545.45	6161.94
4.55373	2.27501	0.00225	4553.73	6205.9
4.56204	2.2744	0.00226	4562.04	6222.13
4.57038	2.27379	0.00228	4570.38	6265.74
4.57875	2.27317	0.0023	4578.75	6309.15
4.58716	2.27255	0.00231	4587.16	6324.96
4.59559	2.27193	0.00233	4595.59	6368.02
4.60405	2.2713	0.00234	4604.05	6383.6
4.61255	2.27067	0.00236	4612.55	6426.29
4.62107	2.27003	0.00238	4621.07	6468.8
4.62963	2.26939	0.00239	4629.63	6483.97
4.63822	2.26875	0.00241	4638.22	6526.12
4.64684	2.2681	0.00243	4646.84	6568.08
4.65549	2.26745	0.00245	4655.49	6609.83
4.66418	2.2668	0.00246	4664.18	6624.44
4.6729	2.26614	0.00248	4672.9	6665.84
4.68165	2.26548	0.0025	4681.65	6707.04
4.69043	2.26481	0.00252	4690.43	6748.04
4.69925	2.26414	0.00254	4699.25	6788.83
4.7081	2.26347	0.00255	4708.1	6802.74
4.71698	2.26279	0.00257	4716.98	6843.19
4.7259	2.2621	0.00259	4725.9	6883.43
4.73485	2.26142	0.00261	4734.85	6923.47
4.74383	2.26073	0.00263	4743.83	6963.32
4.75285	2.26003	0.00265	4752.85	7002.96
4.7619	2.25933	0.00267	4761.9	7042.4
4.77099	2.25862	0.00269	4770.99	7081.63
4.78011	2.25792	0.00271	4780.11	7120.67
4.78927	2.2572	0.00273	4789.27	7159.5
4.79846	2.25648	0.00275	4798.46	7198.14
4.80769	2.25576	0.00277	4807.69	7236.57
4.81696	2.25503	0.00279	4816.96	7274.8
4.82625	2.2543	0.00281	4826.25	7312.84
4.83559	2.25357	0.00283	4835.59	7350.66
4.84496	2.25283	0.00286	4844.96	7414.22
4.85437	2.25208	0.00288	4854.37	7451.6
4.86381	2.25133	0.0029	4863.81	7488.78
4.87329	2.25057	0.00292	4873.29	7525.76
4.88281	2.24981	0.00294	4882.81	7562.53
4.89237	2.24905	0.00297	4892.37	7624.77
4.90196	2.24828	0.00299	4901.96	7661.1
4.91159	2.2475	0.00301	4911.59	7697.22
4.92126	2.24672	0.00304	4921.26	7758.66
4.93097	2.24594	0.00306	4930.97	7794.33
4.94071	2.24515	0.00308	4940.71	7829.81
4.9505	2.24435	0.00311	4950.5	7890.44
4.96032	2.24355	0.00313	4960.32	7925.46
4.97018	2.24275	0.00316	4970.18	7985.55
4.98008	2.24193	0.00318	4980.08	8020.11
4.99002	2.24112	0.00321	4990.02	8079.65
5	2.2403	0.00323	5000	8113.76
5.01002	2.23947	0.00326	5010.02	8172.74
5.02008	2.23863	0.00329	5020.08	8231.42
5.03018	2.2378	0.00331	5030.18	8264.83
5.04032	2.23695	0.00334	5040.32	8322.96
5.05051	2.2361	0.00337	5050.51	8380.78
5.06073	2.23525	0.0034	5060.73	8438.31
5.07099	2.23438	0.00342	5070.99	8470.77
5.0813	2.23352	0.00345	5081.3	8527.74
5.09165	2.23264	0.00348	5091.65	8584.41
5.10204	2.23177	0.00351	5102.04	8640.78
5.11247	2.23088	0.00354	5112.47	8696.85
5.12295	2.22999	0.00357	5122.95	8752.61
5.13347	2.22909	0.0036	5133.47	8808.08
5.14403	2.22819	0.00363	5144.03	8863.25
5.15464	2.22728	0.00366	5154.64	8918.1
5.16529	2.22636	0.00369	5165.29	8972.66
5.17598	2.22544	0.00372	5175.98	9026.93
5.18672	2.22451	0.00375	5186.72	9080.88
5.19751	2.22358	0.00379	5197.51	9158.69
5.20833	2.22263	0.00382	5208.33	9212.01
5.21921	2.22168	0.00385	5219.21	9265
5.23013	2.22073	0.00388	5230.13	9317.7
5.24109	2.21977	0.00392	5241.09	9394.08
5.2521	2.2188	0.00395	5252.1	9446.13
5.26316	2.21782	0.00399	5263.16	9521.73
5.27426	2.21684	0.00402	5274.26	9573.13
5.28541	2.21585	0.00406	5285.41	9647.99
5.29661	2.21485	0.00409	5296.61	9698.73
5.30786	2.21385	0.00413	5307.86	9772.83
5.31915	2.21284	0.00417	5319.15	9846.54
5.33049	2.21182	0.0042	5330.49	9896.28
5.34188	2.2108	0.00424	5341.88	9969.22
5.35332	2.20976	0.00428	5353.32	10041.8
5.36481	2.20872	0.00432	5364.81	10113.9
5.37634	2.20767	0.00436	5376.34	10185.7
5.38793	2.20662	0.0044	5387.93	10257
5.39957	2.20555	0.00444	5399.57	10327.9
5.41126	2.20448	0.00448	5411.26	10398.5
5.42299	2.2034	0.00452	5422.99	10468.6
5.43478	2.20232	0.00456	5434.78	10538.3
5.44662	2.20122	0.0046	5446.62	10607.7
5.45852	2.20012	0.00465	5458.52	10699.6
5.47046	2.199	0.00469	5470.46	10768.1
5.48246	2.19788	0.00473	5482.46	10836.2
5.49451	2.19676	0.00478	5494.51	10926.7
5.50661	2.19562	0.00482	5506.61	10993.9
5.51876	2.19447	0.00487	5518.76	11083.5
5.53097	2.19332	0.00492	5530.97	11172.6
5.54324	2.19215	0.00496	5543.24	11238.5
5.55556	2.19098	0.00501	5555.56	11326.6
5.56793	2.1898	0.00506	5567.93	11414.2
5.58036	2.18861	0.00511	5580.36	11501.3
5.59284	2.18741	0.00516	5592.84	11588
5.60538	2.1862	0.00521	5605.38	11674.1
5.61798	2.18498	0.00526	5617.98	11759.7
5.63063	2.18376	0.00531	5630.63	11844.8
5.64334	2.18252	0.00536	5643.34	11929.4
5.65611	2.18127	0.00542	5656.11	12035.7
5.66893	2.18002	0.00547	5668.93	12119.3
5.68182	2.17875	0.00553	5681.82	12224.4
5.69476	2.17747	0.00558	5694.76	12306.9
5.70776	2.17619	0.00564	5707.76	12410.9
5.72082	2.17489	0.00569	5720.82	12492.3
5.73394	2.17358	0.00575	5733.94	12595.2
5.74713	2.17227	0.00581	5747.13	12697.4
5.76037	2.17094	0.00587	5760.37	12799
5.77367	2.1696	0.00593	5773.67	12900.1
5.78704	2.16825	0.00599	5787.04	13000.5
5.80046	2.16689	0.00605	5800.46	13100.3
5.81395	2.16552	0.00612	5813.95	13221.2
5.82751	2.16414	0.00618	5827.51	13319.7
5.84112	2.16274	0.00625	5841.12	13439.2
5.8548	2.16134	0.00631	5854.8	13536.5
5.86854	2.15992	0.00638	5868.54	13654.6
5.88235	2.15849	0.00645	5882.35	13772
5.89623	2.15705	0.00651	5896.23	13867.4
5.91017	2.1556	0.00658	5910.17	13983.5
5.92417	2.15413	0.00666	5924.17	14120.1
5.93824	2.15266	0.00673	5938.24	14234.7
5.95238	2.15117	0.0068	5952.38	14348.5
5.96659	2.14967	0.00687	5966.59	14461.7
5.98086	2.14815	0.00695	5980.86	14595.2
5.9952	2.14662	0.00703	5995.2	14727.9
6.00962	2.14508	0.0071	6009.62	14838.9
6.0241	2.14353	0.00718	6024.1	14970
6.03865	2.14196	0.00726	6038.65	15100.3
6.05327	2.14038	0.00734	6053.27	15229.9
6.06796	2.13879	0.00743	6067.96	15379.3
6.08273	2.13718	0.00751	6082.73	15507.1
6.09756	2.13556	0.0076	6097.56	15654.8
6.11247	2.13393	0.00768	6112.47	15781
6.12745	2.13228	0.00777	6127.45	15926.9
6.14251	2.13061	0.00786	6142.51	16071.9
6.15764	2.12893	0.00795	6157.64	16216
6.17284	2.12724	0.00804	6172.84	16359.1
6.18812	2.12553	0.00814	6188.12	16521.7
6.20347	2.12381	0.00823	6203.47	16663.1
6.21891	2.12207	0.00833	6218.91	16823.7
6.23441	2.12031	0.00843	6234.41	16983.3
6.25	2.11854	0.00853	6250	17141.9
6.26566	2.11676	0.00863	6265.66	17299.5
6.28141	2.11495	0.00873	6281.41	17456.1
6.29723	2.11313	0.00884	6297.23	17631.6
6.31313	2.1113	0.00894	6313.13	17786.2
6.32911	2.10945	0.00905	6329.11	17959.6
6.34518	2.10758	0.00916	6345.18	18131.8
6.36132	2.10569	0.00927	6361.32	18303
6.37755	2.10378	0.00939	6377.55	18492.7
6.39386	2.10186	0.00951	6393.86	18681.3
6.41026	2.09992	0.00962	6410.26	18849
6.42674	2.09796	0.00974	6426.74	19035.2
6.4433	2.09599	0.00987	6443.3	19239.7
6.45995	2.09399	0.00999	6459.95	19423.4
6.47668	2.09198	0.01012	6476.68	19625.4
6.49351	2.08995	0.01025	6493.51	19825.9
6.51042	2.08789	0.01038	6510.42	20025.3
6.52742	2.08582	0.01051	6527.42	20223.2
6.5445	2.08373	0.01065	6544.5	20439.1
6.56168	2.08162	0.01078	6561.68	20634.5
6.57895	2.07948	0.01093	6578.95	20866.7
6.59631	2.07733	0.01107	6596.31	21078.3
6.61376	2.07516	0.01121	6613.76	21288.6
6.6313	2.07296	0.01136	6631.3	21516.4
6.64894	2.07074	0.01151	6648.94	21742.7
6.66667	2.0685	0.01167	6666.67	21986.3
6.68449	2.06624	0.01183	6684.49	22228.3
6.70241	2.06396	0.01199	6702.41	22468.7
6.72043	2.06165	0.01215	6720.43	22707.5
6.73854	2.05932	0.01231	6738.54	22944.7
6.75676	2.05697	0.01248	6756.76	23198.8
6.77507	2.05459	0.01265	6775.07	23451.3
6.79348	2.05219	0.01283	6793.48	23720.5
6.81199	2.04976	0.01301	6811.99	23987.9
6.8306	2.04731	0.01319	6830.6	24253.6
6.84932	2.04484	0.01338	6849.32	24535.7
6.86813	2.04234	0.01357	6868.13	24816
6.88705	2.03981	0.01376	6887.05	25094.3
6.90608	2.03725	0.01396	6906.08	25388.9
6.92521	2.03467	0.01416	6925.21	25681.5
6.94444	2.03207	0.01436	6944.44	25972.1
6.96379	2.02943	0.01457	6963.79	26278.7
6.98324	2.02677	0.01478	6983.24	26583.2
7.0028	2.02408	0.015	7002.8	26903.5
7.02247	2.02136	0.01522	7022.47	27221.6
7.04225	2.01861	0.01545	7042.25	27555.4
7.06215	2.01583	0.01568	7062.15	27886.8
7.08215	2.01302	0.01591	7082.15	28216
7.10227	2.01018	0.01615	7102.27	28560.4
7.12251	2.00731	0.0164	7122.51	28920.1
7.14286	2.0044	0.01665	7142.86	29277.3
7.16332	2.00147	0.0169	7163.32	29632.1
7.18391	1.9985	0.01716	7183.91	30001.7
7.20461	1.9955	0.01743	7204.61	30386.2
7.22543	1.99247	0.0177	7225.43	30768
7.24638	1.9894	0.01798	7246.38	31164.4
7.26744	1.9863	0.01826	7267.44	31558
7.28863	1.98316	0.01855	7288.63	31966
7.30994	1.97999	0.01885	7309.94	32388.2
7.33138	1.97678	0.01915	7331.38	32807.5
7.35294	1.97353	0.01946	7352.94	33240.8
7.37463	1.97025	0.01978	7374.63	33688
7.39645	1.96693	0.0201	7396.45	34132
7.4184	1.96357	0.02043	7418.4	34589.8
7.44048	1.96017	0.02077	7440.48	35061.1
7.46269	1.95673	0.02111	7462.69	35529
7.48503	1.95325	0.02146	7485.03	36010.2
7.50751	1.94972	0.02182	7507.51	36504.7
7.53012	1.94616	0.02219	7530.12	37012.2
7.55287	1.94255	0.02257	7552.87	37532.6
7.57576	1.9389	0.02296	7575.76	38065.8
7.59878	1.93521	0.02335	7598.78	38595.1
7.62195	1.93147	0.02376	7621.95	39153.4
7.64526	1.92768	0.02417	7645.26	39707.6
7.66871	1.92385	0.02459	7668.71	40274.1
7.69231	1.91997	0.02503	7692.31	40869
7.71605	1.91604	0.02547	7716.05	41459.5
7.73994	1.91206	0.02592	7739.94	42061.7
7.76398	1.90803	0.02639	7763.98	42691.8
7.78816	1.90396	0.02687	7788.16	43333.4
7.8125	1.89983	0.02736	7812.5	43986.1
7.83699	1.89564	0.02786	7836.99	44650
7.86164	1.89141	0.02837	7861.64	45324.8
7.88644	1.88712	0.02889	7886.44	46010.4
7.91139	1.88277	0.02943	7911.39	46722.6
7.93651	1.87836	0.02999	7936.51	47461
7.96178	1.8739	0.03055	7961.78	48193.7
7.98722	1.86938	0.03113	7987.22	48952.3
8.01282	1.8648	0.03173	8012.82	49736.4
8.03859	1.86016	0.03234	8038.59	50530.1
8.06452	1.85546	0.03297	8064.52	51348.8
8.09061	1.85069	0.03361	8090.61	52176.7
8.11688	1.84586	0.03427	8116.88	53029.1
8.14332	1.84096	0.03495	8143.32	53905.8
8.16993	1.83599	0.03564	8169.93	54791
8.19672	1.83096	0.03636	8196.72	55715.2
8.22368	1.82585	0.03709	8223.68	56647.4
8.25083	1.82068	0.03784	8250.83	57602.7
8.27815	1.81543	0.03862	8278.15	58596.1
8.30565	1.81011	0.03941	8305.65	59596.7
8.33333	1.80471	0.04023	8333.33	60634.7
8.3612	1.79923	0.04107	8361.2	61694.4
8.38926	1.79368	0.04193	8389.26	62775.6
8.41751	1.78804	0.04282	8417.51	63892.9
8.44595	1.78233	0.04373	8445.95	65031
8.47458	1.77653	0.04467	8474.58	66204.5
8.5034	1.77064	0.04564	8503.4	67412.8
8.53242	1.76466	0.04663	8532.42	68640.9
8.56164	1.7586	0.04766	8561.64	69917.6
8.59107	1.75245	0.04871	8591.07	71213.2
8.62069	1.7462	0.0498	8620.69	72556.6
8.65052	1.73986	0.05091	8650.52	73918.1
8.68056	1.73341	0.05207	8680.56	75340.7
8.7108	1.72687	0.05325	8710.8	76780.5
8.74126	1.72023	0.05447	8741.26	78266
8.77193	1.71349	0.05573	8771.93	79796.4
8.80282	1.70664	0.05703	8802.82	81371.3
8.83392	1.69968	0.05837	8833.92	82990
8.86525	1.6926	0.05976	8865.25	84666
8.8968	1.68542	0.06118	8896.8	86370.5
8.92857	1.67812	0.06265	8928.57	88131
8.96057	1.6707	0.06417	8960.57	89946.9
8.99281	1.66315	0.06574	8992.81	91817.2
9.02527	1.65549	0.06736	9025.27	93741.4
9.05797	1.64769	0.06904	9057.97	95732.5
9.09091	1.63976	0.07077	9090.91	97775.8
9.12409	1.63171	0.07256	9124.09	99884.3
9.15751	1.62351	0.07441	9157.51	102057
9.19118	1.61517	0.07632	9191.18	104293
9.22509	1.60669	0.0783	9225.09	106606
9.25926	1.59806	0.08035	9259.26	108993
9.29368	1.58928	0.08247	9293.68	111455
9.32836	1.58035	0.08467	9328.36	114002
9.3633	1.57126	0.08695	9363.3	116635
9.3985	1.562	0.08931	9398.5	119352
9.43396	1.55258	0.09176	9433.96	122166
9.4697	1.54298	0.09429	9469.7	125060
9.5057	1.53322	0.09693	9505.7	128075
9.54198	1.52327	0.09966	9541.98	131181
9.57854	1.51313	0.1025	9578.54	134405
9.61538	1.50281	0.10544	9615.38	137730
9.65251	1.49229	0.10851	9652.51	141195
9.68992	1.48157	0.11169	9689.92	144772
9.72763	1.47065	0.115	9727.63	148484
9.76563	1.45952	0.11845	9765.63	152344
9.80392	1.44817	0.12204	9803.92	156348
9.84252	1.4366	0.12578	9842.52	160507
9.88142	1.4248	0.12967	9881.42	164820
9.92063	1.41277	0.13373	9920.63	169309
9.96016	1.4005	0.13797	9960.16	173983
10	1.38799	0.14239	10000	178842
10.0402	1.37522	0.14701	10040.2	183906
10.0807	1.36219	0.15184	10080.6	189185
10.1215	1.3489	0.15689	10121.5	194689
10.1626	1.33534	0.16217	10162.6	200427
10.2041	1.3215	0.1677	10204.1	206419
10.2459	1.30738	0.17349	10245.9	212674
10.2881	1.29296	0.17956	10288.1	219213
10.3306	1.27825	0.18594	10330.6	226067
10.3734	1.26324	0.19263	10373.4	233233
10.4167	1.24792	0.19966	10416.7	240742
10.4603	1.23229	0.20705	10460.2	248612
10.5042	1.21634	0.21483	10504.2	256875
10.5485	1.20007	0.22302	10548.5	265547
10.5932	1.18348	0.23165	10593.2	274659
10.6383	1.16656	0.24076	10638.3	284251
10.6838	1.14932	0.25037	10683.8	294339
10.7296	1.13177	0.26052	10729.6	304963
10.7759	1.1139	0.27126	10775.9	316172
10.8225	1.09572	0.28262	10822.5	327993
10.8696	1.07725	0.29464	10869.6	340462
10.917	1.05851	0.30737	10917	353628
10.9649	1.03951	0.32087	10964.9	367548
11.0132	1.02029	0.33517	11013.2	382244
11.0619	1.00088	0.35034	11062	397784
11.1111	0.98133	0.36642	11111.1	414201
11.1607	0.96169	0.38346	11160.7	431537
11.2108	0.94202	0.4015	11210.8	449821
11.2613	0.92239	0.4206	11261.3	469107
11.3122	0.90289	0.44079	11312.2	489411
11.3636	0.88361	0.46208	11363.6	510728
11.4155	0.86465	0.48449	11415.5	533063
11.4679	0.84611	0.50803	11467.9	556411
11.5207	0.8281	0.53266	11520.7	580710
11.5741	0.81073	0.55836	11574.1	605924
11.6279	0.79409	0.58507	11627.9	631969
11.6822	0.77829	0.61272	11682.2	658757
11.7371	0.7634	0.64122	11737.1	686177
11.7925	0.74948	0.67048	11792.5	714120
11.8483	0.73657	0.70039	11848.3	742458
11.9048	0.72471	0.73086	11904.8	771087
11.9617	0.71391	0.76178	11961.7	799881
12.0192	0.70416	0.79306	12019.2	828741
12.0773	0.69544	0.82459	12077.3	857548
12.1359	0.68772	0.85631	12135.9	886233
12.1951	0.68098	0.88814	12195.1	914713
12.2549	0.67516	0.92002	12254.9	942925
12.3153	0.67024	0.95191	12315.3	970826
12.3762	0.66615	0.98374	12376.2	998346
12.4378	0.66286	1.0155	12437.8	1.02548e+06
12.5	0.66033	1.04716	12500	1.05219e+06
12.5628	0.65851	1.07869	12562.8	1.07845e+06
12.6263	0.65735	1.11007	12626.3	1.10424e+06
12.6904	0.65684	1.1413	12690.4	1.12958e+06
12.7551	0.65692	1.17237	12755.1	1.15444e+06
12.8205	0.65757	1.20327	12820.5	1.17882e+06
12.8866	0.65875	1.23399	12886.6	1.20272e+06
12.9534	0.66045	1.26455	12953.4	1.22615e+06
13.0208	0.66263	1.29493	13020.8	1.2491e+06
13.089	0.66528	1.32514	13089	1.27158e+06
13.1579	0.66836	1.35518	13157.9	1.2936e+06
13.2275	0.67187	1.38506	13227.5	1.31516e+06
13.2979	0.67578	1.41478	13297.9	1.33628e+06
13.369	0.68008	1.44434	13369	1.35694e+06
13.4409	0.68476	1.47374	13440.9	1.37716e+06
13.5135	0.6898	1.503	13513.5	1.39695e+06
13.587	0.69519	1.53211	13587	1.41631e+06
13.6612	0.70092	1.56108	13661.2	1.43524e+06
13.7363	0.70697	1.58992	13736.3	1.45377e+06
13.8122	0.71335	1.61863	13812.1	1.47189e+06
13.8889	0.72004	1.64721	13888.9	1.4896e+06
13.9665	0.72703	1.67567	13966.5	1.50692e+06
14.0449	0.73431	1.70401	14044.9	1.52385e+06
14.1243	0.74188	1.73223	14124.3	1.54038e+06
14.2045	0.74974	1.76035	14204.5	1.55654e+06
14.2857	0.75787	1.78836	14285.7	1.57233e+06

## Sheet: Perovskite
Wavelength (µm)	Extinction Coeff (k)	Wavelength (nm)	Absorption Coeff (1/m)		Wavelength (nm)	Refractive Index (n)		REFRENCE
0.301	0.8304	301	3.46506e+07		301	1.48952		[38] J. M. Ball, S. D. Stranks, M. T. Hörantner, S. Hüttner,
0.302	0.8345	302	3.47064e+07		302	1.48478		W. Zhang, E. J. W. Crossland, I. Ramirez, M. Riede, M. B. Johnston, R. H. Friend, H. J. Snaith,
0.303	0.83925	303	3.47887e+07		303	1.4804		Optical properties and limiting photocurrent of thin-film perovskite solar cells, Energy Environ. Science 8 (2015) 602-09.
0.304	0.84455	304	3.48933e+07		304	1.47642		Supplementary materials
0.305	0.85049	305	3.50235e+07		305	1.47298
0.306	0.85698	306	3.51754e+07		306	1.46993
0.307	0.86393	307	3.53451e+07		307	1.4674
0.308	0.87129	308	3.55305e+07		308	1.46538
0.309	0.87895	309	3.57269e+07		309	1.46386
0.31	0.88704	310	3.59394e+07		310	1.46291
0.311	0.89544	311	3.61631e+07		311	1.46242
0.312	0.90408	312	3.6395e+07		312	1.46248
0.313	0.91286	313	3.66311e+07		313	1.46301
0.314	0.92189	314	36875600		314	1.46414
0.315	0.93109	315	3.71254e+07		315	1.46574
0.316	0.9404	316	3.73779e+07		316	1.4679
0.317	0.94973	317	3.76297e+07		317	1.47055
0.318	0.95914	318	3.7883e+07		318	1.47365
0.319	0.96861	319	3.81371e+07		319	1.47731
0.32	0.97807	320	3.83892e+07		320	1.48153
0.321	0.98744	321	3.86363e+07		321	1.48612
0.322	0.99677	322	3.88802e+07		322	1.4912
0.323	1.00611	323	3.9123e+07		323	1.49684
0.324	1.01522	324	3.93554e+07		324	1.50287
0.325	1.02417	325	3.95802e+07		325	1.50928
0.326	1.03313	326	3.9804e+07		326	1.51618
0.327	1.04186	327	4.00176e+07		327	1.52351
0.328	1.05039	328	4.02223e+07		328	1.53118
0.329	1.05858	329	4.04127e+07		329	1.53924
0.33	1.0667	330	4.05992e+07		330	1.54775
0.331	1.0746	331	4.07764e+07		331	1.55655
0.332	1.08215	332	4.09392e+07		332	1.56565
0.333	1.08945	333	4.10916e+07		333	1.57516
0.334	1.09645	334	4.12318e+07		334	1.5849
0.335	1.10312	335	4.13588e+07		335	1.59496
0.336	1.10952	336	4.14749e+07		336	1.60524
0.337	1.11566	337	4.15807e+07		337	1.61591
0.338	1.12135	338	4.16691e+07		338	1.62668
0.339	1.12679	339	4.17477e+07		339	1.6377
0.34	1.13183	340	4.18111e+07		340	1.64892
0.341	1.13654	341	4.1862e+07		341	1.66044
0.342	1.14088	342	4.1899e+07		342	1.67192
0.343	1.14485	343	4.19222e+07		343	1.68366
0.344	1.14847	344	4.19325e+07		344	1.69554
0.345	1.15164	345	4.19264e+07		345	1.7074
0.346	1.15449	346	4.19087e+07		346	1.71942
0.347	1.15691	347	4.18755e+07		347	1.73161
0.348	1.15902	348	4.18313e+07		348	1.74376
0.349	1.16072	349	4.17726e+07		349	1.75588
0.35	1.16202	350	4.16999e+07		350	1.76807
0.351	1.16302	351	4.16169e+07		351	1.78026
0.352	1.16357	352	4.15183e+07		352	1.79234
0.353	1.1638	353	4.14089e+07		353	1.80449
0.354	1.16367	354	4.12873e+07		354	1.81648
0.355	1.16315	355	4.11526e+07		355	1.82842
0.356	1.16229	356	4.10066e+07		356	1.84036
0.357	1.16104	357	4.08478e+07		357	1.85212
0.358	1.15955	358	4.06814e+07		358	1.8637
0.359	1.15769	359	4.0503e+07		359	1.87528
0.36	1.15554	360	4.03155e+07		360	1.88667
0.361	1.1531	361	4.01189e+07		361	1.89776
0.362	1.15033	362	3.9912e+07		362	1.90882
0.363	1.1473	363	3.96972e+07		363	1.91961
0.364	1.14398	364	3.94736e+07		364	1.93021
0.365	1.14044	365	3.92436e+07		365	1.94071
0.366	1.13655	366	3.90029e+07		366	1.95087
0.367	1.13258	367	3.87608e+07		367	1.96075
0.368	1.1283	368	3.85094e+07		368	1.97056
0.369	1.12386	369	3.82539e+07		369	1.98005
0.37	1.11922	370	3.7993e+07		370	1.9893
0.371	1.1144	371	3.77274e+07		371	1.99829
0.372	1.10943	372	3.74582e+07		372	2.00703
0.373	1.1043	373	3.7185e+07		373	2.01558
0.374	1.09895	374	3.69059e+07		374	2.02382
0.375	1.09362	375	3.6629e+07		375	2.03175
0.376	1.08809	376	3.63468e+07		376	2.03947
0.377	1.08248	377	3.60635e+07		377	2.04697
0.378	1.07684	378	3.57807e+07		378	2.05418
0.379	1.07111	379	3.54964e+07		379	2.06104
0.38	1.06527	380	3.521e+07		380	2.06777
0.381	1.05946	381	3.4926e+07		381	2.07414
0.382	1.05353	382	3.46396e+07		382	2.08034
0.383	1.04765	383	3.43564e+07		383	2.08625
0.384	1.04174	384	3.40736e+07		384	2.0919
0.385	1.03577	385	3.37903e+07		385	2.09732
0.386	1.02988	386	3.35111e+07		386	2.10248
0.387	1.02398	387	3.3233e+07		387	2.10742
0.388	1.0181	388	3.29571e+07		388	2.1121
0.389	1.0123	389	3.26851e+07		389	2.11655
0.39	1.00649	390	3.24141e+07		390	2.12085
0.391	1.00072	391	3.21459e+07		391	2.12493
0.392	0.99505	392	3.18822e+07		392	2.12875
0.393	0.9894	393	3.16205e+07		393	2.13241
0.394	0.98384	394	3.1363e+07		394	2.13588
0.395	0.97839	395	3.11103e+07		395	2.1391
0.396	0.97297	396	3.08599e+07		396	2.1422
0.397	0.96769	397	3.06151e+07		397	2.14513
0.398	0.96246	398	3.03731e+07		398	2.14791
0.399	0.95732	399	3.01352e+07		399	2.15047
0.4	0.95231	400	29902534		400	2.1529
0.401	0.9474	401	2.96742e+07		401	2.15521
0.402	0.94258	402	2.94498e+07		402	2.15742
0.403	0.93793	403	2.92318e+07		403	2.15935
0.404	0.93333	404	2.90164e+07		404	2.16126
0.405	0.92888	405	2.88067e+07		405	2.16308
0.406	0.92454	406	2.86015e+07		406	2.16473
0.407	0.92029	407	2.84001e+07		407	2.1663
0.408	0.9162	408	2.82046e+07		408	2.16776
0.409	0.91224	409	2.8014e+07		409	2.16916
0.41	0.90836	410	2.78268e+07		410	2.17043
0.411	0.90465	411	2.76458e+07		411	2.17164
0.412	0.90104	412	2.74686e+07		412	2.17274
0.413	0.89755	413	2.7296e+07		413	2.17384
0.414	0.89421	414	2.71287e+07		414	2.17487
0.415	0.89098	415	2.69656e+07		415	2.17584
0.416	0.88786	416	2.68065e+07		416	2.17672
0.417	0.88491	417	2.66534e+07		417	2.17764
0.418	0.88205	418	2.65037e+07		418	2.17842
0.419	0.87933	419	2.63589e+07		419	2.17926
0.42	0.87671	420	2.62178e+07		420	2.18003
0.421	0.87421	421	2.60809e+07		421	2.18077
0.422	0.87184	422	2.59486e+07		422	2.18159
0.423	0.86959	423	2.58205e+07		423	2.18231
0.424	0.86744	424	2.56959e+07		424	2.18305
0.425	0.86542	425	2.55757e+07		425	2.18377
0.426	0.86349	426	2.54588e+07		426	2.1845
0.427	0.86169	427	2.53462e+07		427	2.18523
0.428	0.86	428	2.52374e+07		428	2.18596
0.429	0.85839	429	2.51314e+07		429	2.18677
0.43	0.85688	430	2.50289e+07		430	2.18753
0.431	0.8555	431	2.49306e+07		431	2.18837
0.432	0.85419	432	2.48348e+07		432	2.18922
0.433	0.85299	433	2.47426e+07		433	2.19014
0.434	0.85186	434	2.46529e+07		434	2.19102
0.435	0.85082	435	2.45662e+07		435	2.192
0.436	0.84988	436	2.44828e+07		436	2.19306
0.437	0.84901	437	2.44018e+07		437	2.19408
0.438	0.84821	438	2.43231e+07		438	2.19518
0.439	0.84749	439	2.42471e+07		439	2.19636
0.44	0.84684	440	2.41734e+07		440	2.19758
0.441	0.84626	441	2.41021e+07		441	2.19884
0.442	0.84574	442	2.40328e+07		442	2.20018
0.443	0.84526	443	2.39649e+07		443	2.2016
0.444	0.84486	444	2.38996e+07		444	2.20306
0.445	0.8445	445	2.38358e+07		445	2.20464
0.446	0.84419	446	2.37736e+07		446	2.20622
0.447	0.84391	447	2.37125e+07		447	2.20787
0.448	0.84369	448	2.36535e+07		448	2.20957
0.449	0.84349	449	2.35952e+07		449	2.2114
0.45	0.84333	450	2.35383e+07		450	2.21335
0.451	0.84319	451	2.34822e+07		451	2.21529
0.452	0.84307	452	2.34269e+07		452	2.21731
0.453	0.84298	453	2.33727e+07		453	2.21938
0.454	0.8429	454	2.3319e+07		454	2.22159
0.455	0.84283	455	2.32658e+07		455	2.22389
0.456	0.84276	456	2.32129e+07		456	2.2262
0.457	0.8427	457	2.31604e+07		457	2.22859
0.458	0.84264	458	2.31082e+07		458	2.23113
0.459	0.84257	459	2.30559e+07		459	2.23372
0.46	0.8425	460	2.30039e+07		460	2.23639
0.461	0.8424	461	2.29513e+07		461	2.23906
0.462	0.8423	462	2.28989e+07		462	2.24183
0.463	0.84217	463	2.28459e+07		463	2.24475
0.464	0.84202	464	2.27926e+07		464	2.24765
0.465	0.84184	465	2.27387e+07		465	2.25063
0.466	0.84163	466	2.26843e+07		466	2.25376
0.467	0.84139	467	2.26292e+07		467	2.2569
0.468	0.84111	468	2.25734e+07		468	2.26007
0.469	0.84078	469	2.25164e+07		469	2.26333
0.47	0.84042	470	2.24589e+07		470	2.26666
0.471	0.84001	471	2.24003e+07		471	2.27002
0.472	0.83954	472	2.23403e+07		472	2.27345
0.473	0.83903	473	2.22795e+07		473	2.27697
0.474	0.83847	474	2.22177e+07		474	2.28049
0.475	0.83784	475	2.21543e+07		475	2.2841
0.476	0.83716	476	2.20898e+07		476	2.28775
0.477	0.83641	477	2.20237e+07		477	2.29141
0.478	0.8356	478	2.19564e+07		478	2.29507
0.479	0.83472	479	2.18874e+07		479	2.29885
0.48	0.83378	480	2.18172e+07		480	2.30263
0.481	0.83278	481	2.17458e+07		481	2.30638
0.482	0.83169	482	2.16723e+07		482	2.31028
0.483	0.83054	483	2.15975e+07		483	2.31414
0.484	0.82933	484	2.15215e+07		484	2.31796
0.485	0.82803	485	2.14434e+07		485	2.32194
0.486	0.82666	486	2.13639e+07		486	2.32585
0.487	0.82521	487	2.12826e+07		487	2.32975
0.488	0.8237	488	2.12001e+07		488	2.33369
0.489	0.8221	489	2.11157e+07		489	2.33762
0.49	0.82043	490	2.10298e+07		490	2.34152
0.491	0.81869	491	2.09425e+07		491	2.34552
0.492	0.81687	492	2.08534e+07		492	2.34941
0.493	0.81499	493	2.07632e+07		493	2.35335
0.494	0.81302	494	2.06711e+07		494	2.35729
0.495	0.81097	495	2.05773e+07		495	2.3612
0.496	0.80886	496	2.04824e+07		496	2.36509
0.497	0.80668	497	2.03861e+07		497	2.36891
0.498	0.80442	498	2.02882e+07		498	2.37276
0.499	0.80209	499	2.01889e+07		499	2.37657
0.5	0.79969	500	2.00882e+07		500	2.38035
0.501	0.79724	501	1.99867e+07		501	2.3841
0.502	0.7947	502	1.98833e+07		502	2.38782
0.503	0.7921	503	1.97789e+07		503	2.39156
0.504	0.78944	504	1.96733e+07		504	2.39524
0.505	0.78672	505	1.95667e+07		505	2.39879
0.506	0.78395	506	1.94593e+07		506	2.40237
0.507	0.7811	507	1.93503e+07		507	2.40591
0.508	0.7782	508	1.92405e+07		508	2.40945
0.509	0.77525	509	1.91299e+07		509	2.41287
0.51	0.77225	510	1.90185e+07		510	2.41625
0.511	0.7692	511	1.89064e+07		511	2.41952
0.512	0.7661	512	1.87934e+07		512	2.42281
0.513	0.76294	513	1.86794e+07		513	2.4261
0.514	0.75973	514	1.85646e+07		514	2.42928
0.515	0.75649	515	1.84495e+07		515	2.43239
0.516	0.75323	516	1.83344e+07		516	2.43542
0.517	0.74991	517	1.82183e+07		517	2.43847
0.518	0.74654	518	1.81014e+07		518	2.44142
0.519	0.74315	519	1.79845e+07		519	2.44432
0.52	0.73971	520	1.78668e+07		520	2.44712
0.521	0.73628	521	1.77499e+07		521	2.44991
0.522	0.7328	522	1.76321e+07		522	2.45261
0.523	0.72928	523	1.75139e+07		523	2.45528
0.524	0.72574	524	1.73956e+07		524	2.45784
0.525	0.72218	525	1.72773e+07		525	2.4604
0.526	0.71859	526	1.71587e+07		526	2.46289
0.527	0.71499	527	1.70404e+07		527	2.46522
0.528	0.71141	528	1.69229e+07		528	2.46762
0.529	0.70778	529	1.68048e+07		529	2.46989
0.53	0.70413	530	1.66866e+07		530	2.47209
0.531	0.70048	531	1.65688e+07		531	2.47428
0.532	0.69681	532	1.6451e+07		532	2.47637
0.533	0.69314	533	1.63337e+07		533	2.47841
0.534	0.68946	534	1.62165e+07		534	2.48036
0.535	0.68578	535	1.60998e+07		535	2.48223
0.536	0.68213	536	1.59842e+07		536	2.48414
0.537	0.67844	537	1.58682e+07		537	2.48587
0.538	0.67475	538	1.57525e+07		538	2.48766
0.539	0.67107	539	1.56375e+07		539	2.48931
0.54	0.66739	540	1.5523e+07		540	2.49089
0.541	0.66372	541	1.54091e+07		541	2.49248
0.542	0.66005	542	1.52956e+07		542	2.49404
0.543	0.65639	543	1.51828e+07		543	2.49545
0.544	0.65273	544	1.50704e+07		544	2.49686
0.545	0.64909	545	1.49588e+07		545	2.49823
0.546	0.64546	546	1.48479e+07		546	2.49946
0.547	0.64185	547	1.47379e+07		547	2.50067
0.548	0.63827	548	1.4629e+07		548	2.50189
0.549	0.63468	549	1.45202e+07		549	2.50302
0.55	0.63111	550	1.44123e+07		550	2.50412
0.551	0.62755	551	1.4305e+07		551	2.5052
0.552	0.62401	552	1.41985e+07		552	2.50617
0.553	0.62048	553	1.40926e+07		553	2.50708
0.554	0.61697	554	1.39876e+07		554	2.50802
0.555	0.61348	555	1.38834e+07		555	2.50887
0.556	0.61002	556	1.37803e+07		556	2.50964
0.557	0.60657	557	1.36778e+07		557	2.51044
0.558	0.60315	558	1.35763e+07		558	2.51117
0.559	0.59975	559	1.34756e+07		559	2.5118
0.56	0.59637	560	1.33757e+07		560	2.51251
0.561	0.59302	561	1.32769e+07		561	2.51308
0.562	0.58968	562	1.31786e+07		562	2.51363
0.563	0.58637	563	1.30814e+07		563	2.51415
0.564	0.58309	564	1.29851e+07		564	2.51464
0.565	0.57983	565	1.28897e+07		565	2.5151
0.566	0.5766	566	1.27952e+07		566	2.51551
0.567	0.57339	567	1.27015e+07		567	2.51593
0.568	0.5702	568	1.26086e+07		568	2.51629
0.569	0.56706	569	1.25172e+07		569	2.51656
0.57	0.56392	570	1.2426e+07		570	2.51688
0.571	0.56083	571	1.23363e+07		571	2.51713
0.572	0.55775	572	1.22471e+07		572	2.51737
0.573	0.5547	573	1.21589e+07		573	2.51751
0.574	0.55168	574	1.20716e+07		574	2.51773
0.575	0.54869	575	1.19853e+07		575	2.51785
0.576	0.54572	576	1.18997e+07		576	2.51797
0.577	0.54279	577	1.18153e+07		577	2.5181
0.578	0.53987	578	1.17314e+07		578	2.51812
0.579	0.53696	579	1.1648e+07		579	2.5182
0.58	0.53411	580	1.15662e+07		580	2.5182
0.581	0.53129	581	1.14854e+07		581	2.5182
0.582	0.52849	582	1.14052e+07		582	2.5182
0.583	0.52572	583	1.1326e+07		583	2.51817
0.584	0.52298	584	1.12477e+07		584	2.5181
0.585	0.52026	585	1.117e+07		585	2.51803
0.586	0.51757	586	1.10933e+07		586	2.51791
0.587	0.51492	587	1.10177e+07		587	2.51778
0.588	0.51229	588	1.09428e+07		588	2.51766
0.589	0.50968	589	1.08686e+07		589	2.51748
0.59	0.50709	590	1.0795e+07		590	2.51732
0.591	0.50454	591	1.07225e+07		591	2.5171
0.592	0.50202	592	1.0651e+07		592	2.51695
0.593	0.49953	593	1.05803e+07		593	2.5167
0.594	0.49707	594	1.05104e+07		594	2.51646
0.595	0.49463	595	1.04413e+07		595	2.51621
0.596	0.49222	596	1.0373e+07		596	2.51597
0.597	0.48982	597	1.03051e+07		597	2.51569
0.598	0.48746	598	1.02383e+07		598	2.51538
0.599	0.48513	599	1.01723e+07		599	2.51514
0.6	0.48282	600	10107032		600	2.51479
0.601	0.48055	601	1.00428e+07		601	2.51452
0.602	0.47828	602	9.97873e+06		602	2.51416
0.603	0.47604	603	9.91553e+06		603	2.51379
0.604	0.47384	604	9.85336e+06		604	2.51351
0.605	0.47167	605	9.79203e+06		605	2.51316
0.606	0.46953	606	9.73151e+06		606	2.51279
0.607	0.46739	607	9671200		607	2.51242
0.608	0.46528	608	9.61171e+06		608	2.51205
0.609	0.46321	609	9.55323e+06		609	2.51159
0.61	0.46116	610	9495360		610	2.51122
0.611	0.45914	611	9.4383e+06		611	2.51086
0.612	0.45712	612	9.38142e+06		612	2.51042
0.613	0.45515	613	9.32575e+06		613	2.51002
0.614	0.4532	614	9.27067e+06		614	2.50964
0.615	0.45126	615	9.21598e+06		615	2.50919
0.616	0.44935	616	9.16207e+06		616	2.50876
0.617	0.44747	617	9.10895e+06		617	2.50835
0.618	0.44561	618	9.05641e+06		618	2.50789
0.619	0.44376	619	9.00424e+06		619	2.50749
0.62	0.44195	620	8.95305e+06		620	2.50705
0.621	0.44017	621	8.90263e+06		621	2.50662
0.622	0.4384	622	8.85258e+06		622	2.50622
0.623	0.43664	623	8.80289e+06		623	2.50574
0.624	0.43492	624	8.75416e+06		624	2.50529
0.625	0.43322	625	8.70599e+06		625	2.50486
0.626	0.43153	626	8.65817e+06		626	2.50437
0.627	0.42986	627	8.61091e+06		627	2.50398
0.628	0.42823	628	8564600		628	2.50349
0.629	0.42661	629	8.51864e+06		629	2.50305
0.63	0.42501	630	8.47322e+06		630	2.50261
0.631	0.42344	631	8.42854e+06		631	2.50212
0.632	0.42187	632	8.384e+06		632	2.50173
0.633	0.42035	633	8.34059e+06		633	2.50124
0.634	0.41883	634	8.29733e+06		634	2.50081
0.635	0.41733	635	8.25459e+06		635	2.50036
0.636	0.41587	636	8.21278e+06		636	2.49998
0.637	0.4144	637	8.1709e+06		637	2.49948
0.638	0.41297	638	8.12994e+06		638	2.49905
0.639	0.41155	639	8.08931e+06		639	2.4986
0.64	0.41015	640	8.04919e+06		640	2.49821
0.641	0.40878	641	8.00979e+06		641	2.49774
0.642	0.40741	642	7.97051e+06		642	2.49733
0.643	0.40608	643	7.93214e+06		643	2.49691
0.644	0.40476	644	7.89408e+06		644	2.49645
0.645	0.40346	645	7.85652e+06		645	2.49607
0.646	0.40217	646	7.81928e+06		646	2.49561
0.647	0.4009	647	7.78254e+06		647	2.49519
0.648	0.39966	648	7.7465e+06		648	2.49477
0.649	0.39842	649	7.71056e+06		649	2.4944
0.65	0.39721	650	7.67532e+06		650	2.49402
0.651	0.39601	651	7.64038e+06		651	2.49357
0.652	0.39484	652	7.60612e+06		652	2.4932
0.653	0.39368	653	7.57216e+06		653	2.49283
0.654	0.39254	654	7.53869e+06		654	2.49247
0.655	0.39141	655	7.50551e+06		655	2.4921
0.656	0.39031	656	7.47301e+06		656	2.49173
0.657	0.38921	657	7.44061e+06		657	2.49136
0.658	0.38813	658	7.40868e+06		658	2.491
0.659	0.38707	659	7.37724e+06		659	2.49063
0.66	0.38603	660	7.34627e+06		660	2.49026
0.661	0.385	661	7.31558e+06		661	2.48996
0.662	0.38399	662	7.28537e+06		662	2.48963
0.663	0.38299	663	7.25544e+06		663	2.48927
0.664	0.38202	664	7.22616e+06		664	2.48899
0.665	0.38105	665	7.19697e+06		665	2.48868
0.666	0.3801	666	7.16825e+06		666	2.48835
0.667	0.37917	667	7.13999e+06		667	2.48809
0.668	0.37825	668	7.11201e+06		668	2.48782
0.669	0.37736	669	7.08467e+06		669	2.4875
0.67	0.37647	670	7.05741e+06		670	2.48725
0.671	0.3756	671	7.03061e+06		671	2.48701
0.672	0.37474	672	7.00407e+06		672	2.48676
0.673	0.3739	673	6.97799e+06		673	2.48652
0.674	0.37308	674	6.95235e+06		674	2.48627
0.675	0.37227	675	6.92698e+06		675	2.48611
0.676	0.37147	676	6.90187e+06		676	2.48588
0.677	0.37069	677	6.8772e+06		677	2.48567
0.678	0.36992	678	6.8528e+06		678	2.48549
0.679	0.36917	679	6.82883e+06		679	2.48532
0.68	0.36841	680	6.80475e+06		680	2.4852
0.681	0.36769	681	6.78148e+06		681	2.48498
0.682	0.36698	682	6.75846e+06		682	2.48485
0.683	0.36628	683	6.73569e+06		683	2.48473
0.684	0.3656	684	6.71336e+06		684	2.48461
0.685	0.36493	685	6.69127e+06		685	2.48459
0.686	0.36427	686	6.66943e+06		686	2.48446
0.687	0.36363	687	6.64802e+06		687	2.4844
0.688	0.363	688	6.62686e+06		688	2.48432
0.689	0.36238	689	6.60594e+06		689	2.4843
0.69	0.36177	690	6.58526e+06		690	2.4843
0.691	0.36118	691	6.56501e+06		691	2.4843
0.692	0.3606	692	6.54499e+06		692	2.4843
0.693	0.36003	693	6.52522e+06		693	2.4843
0.694	0.35948	694	6.50586e+06		694	2.48432
0.695	0.35894	695	6.48674e+06		695	2.48444
0.696	0.3584	696	6.46768e+06		696	2.4845
0.697	0.35789	697	6.44921e+06		697	2.48459
0.698	0.35738	698	6.43079e+06		698	2.48471
0.699	0.35689	699	6.41279e+06		699	2.48483
0.7	0.3564	700	6.39483e+06		700	2.48502
0.701	0.35593	701	6.37729e+06		701	2.48518
0.702	0.35547	702	6.35998e+06		702	2.48541
0.703	0.35501	703	6.34271e+06		703	2.48565
0.704	0.35457	704	6.32585e+06		704	2.4859
0.705	0.35415	705	6.3094e+06		705	2.48615
0.706	0.35372	706	6.29281e+06		706	2.48649
0.707	0.35331	707	6.27662e+06		707	2.48676
0.708	0.35291	708	6.26066e+06		708	2.48713
0.709	0.35251	709	6.24475e+06		709	2.4875
0.71	0.35212	710	6.22905e+06		710	2.48786
0.711	0.35175	711	6.21376e+06		711	2.48834
0.712	0.35137	712	6.19832e+06		712	2.48884
0.713	0.351	713	6.18311e+06		713	2.48933
0.714	0.35064	714	6.16812e+06		714	2.48982
0.715	0.35028	715	6.15317e+06		715	2.49042
0.716	0.34993	716	6.13844e+06		716	2.49103
0.717	0.34958	717	6.12374e+06		717	2.49165
0.718	0.34924	718	6.10927e+06		718	2.49234
0.719	0.34889	719	6.09466e+06		719	2.49308
0.72	0.34855	720	6.08026e+06		720	2.49381
0.721	0.3482	721	6.06573e+06		721	2.49459
0.722	0.34785	722	6.05124e+06		722	2.49546
0.723	0.3475	723	6.03679e+06		723	2.49632
0.724	0.34714	724	6.02221e+06		724	2.4972
0.725	0.34678	725	6.00766e+06		725	2.49818
0.726	0.34641	726	5.99299e+06		726	2.49922
0.727	0.34603	727	5.97818e+06		727	2.50033
0.728	0.34563	728	5.96307e+06		728	2.50145
0.729	0.34521	729	5.94765e+06		729	2.50265
0.73	0.34479	730	5.93228e+06		730	2.50386
0.731	0.34435	731	5.9166e+06		731	2.50514
0.732	0.34387	732	5.90028e+06		732	2.50657
0.733	0.34337	733	5.88367e+06		733	2.50795
0.734	0.34284	734	5.86658e+06		734	2.50943
0.735	0.34228	735	5.84903e+06		735	2.51098
0.736	0.34168	736	5.83084e+06		736	2.51257
0.737	0.34104	737	5.81202e+06		737	2.51429
0.738	0.34034	738	5.79224e+06		738	2.51602
0.739	0.33959	739	5.77165e+06		739	2.51781
0.74	0.33879	740	5.75027e+06		740	2.51974
0.741	0.33791	741	5.7276e+06		741	2.52172
0.742	0.33696	742	5.7038e+06		742	2.52372
0.743	0.33594	743	5.67888e+06		743	2.52582
0.744	0.33482	744	5.65234e+06		744	2.528
0.745	0.33363	745	5.62469e+06		745	2.53022
0.746	0.3323	746	5.59476e+06		746	2.53257
0.747	0.33088	747	5.56339e+06		747	2.53491
0.748	0.32933	748	5.52993e+06		748	2.53733
0.749	0.32766	749	5.49454e+06		749	2.5398
0.75	0.32583	750	5.45657e+06		750	2.54239
0.751	0.32385	751	5.41619e+06		751	2.54498
0.752	0.32172	752	5.37341e+06		752	2.54757
0.753	0.31941	753	5.32774e+06		753	2.55017
0.754	0.31692	754	5.2792e+06		754	2.55286
0.755	0.31423	755	5.22746e+06		755	2.55549
0.756	0.31134	756	5.17253e+06		756	2.55814
0.757	0.30825	757	5.11443e+06		757	2.56074
0.758	0.30494	758	5.05283e+06		758	2.56332
0.759	0.30139	759	4.98743e+06		759	2.56579
0.76	0.29763	760	4.91873e+06		760	2.56821
0.761	0.29365	761	4.84658e+06		761	2.57048
0.762	0.28946	762	4.77115e+06		762	2.5726
0.763	0.28502	763	4.69181e+06		763	2.57455
0.764	0.28036	764	4.60906e+06		764	2.57637
0.765	0.27551	765	4.52341e+06		765	2.57796
0.766	0.27051	766	4.43552e+06		766	2.57925
0.767	0.26534	767	4.34507e+06		767	2.58033
0.768	0.26002	768	4.25241e+06		768	2.58107
0.769	0.25461	769	4.15852e+06		769	2.5815
0.77	0.24913	770	4.06373e+06		770	2.58169
0.771	0.24355	771	3.96756e+06		771	2.58145
0.772	0.23801	772	3.87229e+06		772	2.58088
0.773	0.23251	773	3.77791e+06		773	2.57996
0.774	0.22707	774	3.68475e+06		774	2.57868
0.775	0.22173	775	3.59346e+06		775	2.57709
0.776	0.21651	776	3.50434e+06		776	2.57515
0.777	0.2115	777	3.41884e+06		777	2.57294
0.778	0.2067	778	3.33696e+06		778	2.57044
0.779	0.20212	779	3.25883e+06		779	2.56764
0.78	0.19778	780	3.18477e+06		780	2.56462
0.781	0.19376	781	3.11604e+06		781	2.56148
0.782	0.19001	782	3.05182e+06		782	2.55813
0.783	0.18654	783	2.99226e+06		783	2.55467
0.784	0.18338	784	2.93782e+06		784	2.55106
0.785	0.18055	785	2888800		785	2.54743
0.786	0.178	786	2.84438e+06		786	2.5438
0.787	0.17572	787	2.80438e+06		787	2.54009
0.788	0.17376	788	2.76958e+06		788	2.5365
0.789	0.17206	789	2.739e+06		789	2.5329
0.79	0.17062	790	2.71264e+06		790	2.52937
0.791	0.16941	791	2.69e+06		791	2.526
0.792	0.16844	792	2.67122e+06		792	2.52277
0.793	0.16767	793	2.65566e+06		793	2.51961
0.794	0.16709	794	2.64314e+06		794	2.51671
0.795	0.16667	795	2.63318e+06		795	2.51402
0.796	0.16629	796	2.62387e+06		796	2.51154
0.797	0.16592	797	2.61475e+06		797	2.50932
0.798	0.16553	798	2.60533e+06		798	2.50713
0.799	0.16515	799	2.5961e+06		799	2.50512
0.8	0.16476	800	2586732		800	2.50313
0.801	0.16437	801	2.57739e+06		801	2.5013
0.802	0.16397	802	2.56791e+06		802	2.49951
0.803	0.16358	803	2.55861e+06		803	2.4978
0.804	0.16318	804	2.54918e+06		804	2.49608
0.805	0.16278	805	2.53977e+06		805	2.4945
0.806	0.16238	806	2.53039e+06		806	2.49297
0.807	0.16198	807	2.52103e+06		807	2.49143
0.808	0.16158	808	2.51169e+06		808	2.49003
0.809	0.16118	809	2.50237e+06		809	2.48857
0.81	0.16078	810	2.49308e+06		810	2.4872
0.811	0.16038	811	2.48381e+06		811	2.48584
0.812	0.15998	812	2.47457e+06		812	2.48447
0.813	0.15958	813	2.46534e+06		813	2.48323
0.814	0.15919	814	2.4563e+06		814	2.48198
0.815	0.15879	815	2.44712e+06		815	2.48074
0.816	0.15839	816	2.43796e+06		816	2.4795
0.817	0.15799	817	2.42883e+06		817	2.47837
0.818	0.1576	818	2.41987e+06		818	2.47721
0.819	0.15721	819	2.41094e+06		819	2.47603
0.82	0.15682	820	2.40202e+06		820	2.47491
0.821	0.15643	821	2.39313e+06		821	2.4739
0.822	0.15604	822	2.38426e+06		822	2.47278
0.823	0.15564	823	2.37526e+06		823	2.47172
0.824	0.15526	824	2.36658e+06		824	2.47072
0.825	0.15487	825	2.35778e+06		825	2.46963
0.826	0.15449	826	2.34915e+06		826	2.46863
0.827	0.1541	827	2.34038e+06		827	2.4677
0.828	0.15373	828	2.33194e+06		828	2.46675
0.829	0.15334	829	2.32322e+06		829	2.46576
0.83	0.15296	830	2.31467e+06		830	2.46485
0.831	0.15259	831	2.30629e+06		831	2.46392
0.832	0.15221	832	2.29779e+06		832	2.46297
0.833	0.15183	833	2.2893e+06		833	2.46207
0.834	0.15145	834	2.28083e+06		834	2.4612
0.835	0.15108	835	2.27253e+06		835	2.46033
0.836	0.15072	836	2.26441e+06		836	2.45946
0.837	0.15035	837	2.25615e+06		837	2.45859
0.838	0.14998	838	2.24791e+06		838	2.45774
0.839	0.14961	839	2.23969e+06		839	2.45695
0.84	0.14925	840	2.23164e+06		840	2.45608
0.841	0.14888	841	2.22346e+06		841	2.4553
0.842	0.14852	842	2.21545e+06		842	2.45446
0.843	0.14816	843	2.20746e+06		843	2.45371
0.844	0.14781	844	2.19964e+06		844	2.45289
0.845	0.14745	845	2.19168e+06		845	2.45212
0.846	0.14709	846	2.18375e+06		846	2.45137
0.847	0.14674	847	2.17598e+06		847	2.45062
0.848	0.14638	848	2.16808e+06		848	2.44987
0.849	0.14603	849	2.16035e+06		849	2.44912
0.85	0.14568	850	2.15264e+06		850	2.44837
0.851	0.14534	851	2.14509e+06		851	2.44768
0.852	0.14499	852	2.13741e+06		852	2.44698
0.853	0.14464	853	2.12975e+06		853	2.44623
0.854	0.1443	854	2.12226e+06		854	2.44558
0.855	0.14396	855	2.11478e+06		855	2.44484
0.856	0.14362	856	2.10732e+06		856	2.44416
0.857	0.14328	857	2.09988e+06		857	2.44344
0.858	0.14294	858	2.09246e+06		858	2.44281
0.859	0.14261	859	2.08519e+06		859	2.44214
0.86	0.14228	860	2.07795e+06		860	2.44146
0.861	0.14194	861	2.07058e+06		861	2.44084
0.862	0.14161	862	2.06337e+06		862	2.44011
0.863	0.14128	863	2.05617e+06		863	2.43949
0.864	0.14095	864	2.049e+06		864	2.43886
0.865	0.14062	865	2.04183e+06		865	2.43824
0.866	0.1403	866	2.03484e+06		866	2.43762
0.867	0.13997	867	2.02771e+06		867	2.43699
0.868	0.13965	868	2.02074e+06		868	2.43637
0.869	0.13933	869	2.01379e+06		869	2.43574
0.87	0.13901	870	2.00686e+06		870	2.43513
0.871	0.13869	871	1.99994e+06		871	2.43459
0.872	0.13837	872	1.99304e+06		872	2.43397
0.873	0.13806	873	1.98629e+06		873	2.43334
0.874	0.13775	874	1.97957e+06		874	2.43282
0.875	0.13744	875	1.97285e+06		875	2.43219
0.876	0.13712	876	1.96601e+06		876	2.43164
0.877	0.13681	877	1.95933e+06		877	2.43104
0.878	0.1365	878	1.95267e+06		878	2.43052
0.879	0.1362	879	1.94616e+06		879	2.42989
0.88	0.13589	880	1.93952e+06		880	2.42933
0.881	0.13559	881	1.93304e+06		881	2.42883
0.882	0.13528	882	1.92644e+06		882	2.42823
0.883	0.13498	883	1.91999e+06		883	2.42769
0.884	0.13468	884	1.91355e+06		884	2.42713
0.885	0.13438	885	1.90713e+06		885	2.42664
0.886	0.13409	886	1.90087e+06		886	2.42612
0.887	0.13379	887	1.89448e+06		887	2.42554
0.888	0.1335	888	1.88824e+06		888	2.42503
0.889	0.1332	889	1.88188e+06		889	2.42454
0.89	0.13291	890	1.87567e+06		890	2.42401
0.891	0.13262	891	1.86948e+06		891	2.42343
0.892	0.13232	892	1.86316e+06		892	2.42293
0.893	0.13204	893	1.85714e+06		893	2.42243
0.894	0.13175	894	1.85098e+06		894	2.42193
0.895	0.13147	895	1.84499e+06		895	2.42143
0.896	0.13118	896	1.83886e+06		896	2.42093
0.897	0.13089	897	1.83275e+06		897	2.42042
0.898	0.13062	898	1.82693e+06		898	2.41993
0.899	0.13033	899	1.82085e+06		899	2.41942

## Sheet: Double Perovskite
Wavelength (nm)	Refractive Index (n)	Wavelength (nm)	Extinction Coeff (k)	Aborption Coeff (1/m)	REFRENCE:
249.827	1.8413	252.249	0.492276	2.45114e+07	[35] Roknuzzaman, M., Zhang, C., Ostrikov, K.K., Du, A., Wang, H., Wang, L. and Tesfamichael, T., 2019.
252.323	1.79296	255.44	0.515176	2.53313e+07	Electronic and optical properties of lead-free hybrid double perovskites for photovoltaic and optoelectronic applications
255.836	1.72693	258.381	0.533579	2.59374e+07	Scientific reports, 9(1), pp.1-7.
260.452	1.65591	262.069	0.564904	2.70737e+07	Supplementary Information
265.586	1.57778	265.515	0.598273	2.83009e+07
270.564	1.51369	268.694	0.632134	2.95489e+07
275.732	1.44609	271.22	0.662395	3.06751e+07
281.101	1.37542	273.423	0.688568	3.16301e+07
288.319	1.32154	275.913	0.721283	3.28339e+07
295.485	1.35427	277.557	0.748682	3.38794e+07
299.87	1.43007	279.168	0.780825	3.513e+07
303.017	1.5074	281.033	0.819838	3.66405e+07
306.138	1.58708	282.606	0.858483	3.8154e+07
308.569	1.66001	284.196	0.894675	3.954e+07
310.084	1.72044	285.401	0.932093	4.10197e+07
312.384	1.79803	286.779	0.970247	4.24937e+07
314.328	1.86716	288.253	1.01306	4.41421e+07
316.295	1.93707	289.908	1.07052	4.63793e+07
318.288	2.00108	290.743	1.10324	4.76595e+07
319.9	2.06325	291.582	1.13431	4.8861e+07
322.349	2.15164	292.426	1.15722	4.97035e+07
324.072	2.20954	293.276	1.18748	5.08556e+07
326.779	2.27618	294.13	1.21692	5.19652e+07
328.907	2.35188	294.989	1.24882	5.3172e+07
332.15	2.43485	296.027	1.28922	5.46998e+07
335.18	2.5173	297.597	1.32897	5.60888e+07
338.549	2.5849	298.477	1.36496	5.74378e+07
342.566	2.65608	299.362	1.40258	5.88466e+07
347.872	2.72829	301.147	1.44981	6.04676e+07
355.835	2.79666	302.954	1.4995	6.21668e+07
368.151	2.83276	304.783	1.54612	6.3715e+07
383.52	2.80288	306.634	1.58354	6.48631e+07
397.866	2.73789	308.508	1.61912	6.59176e+07
411.642	2.66923	310.087	1.64713	6.67166e+07
428.214	2.60047	312.325	1.67575	6.73897e+07
448.154	2.54924	316.237	1.70438	6.76929e+07
471.139	2.49923	321.78	1.70152	6.64152e+07
501.537	2.41851	326.461	1.66839	6.41884e+07
526.355	2.34804	329.121	1.63813	6.25148e+07
549.243	2.28159	331.28	1.60869	6.0991e+07
575.847	2.21105	332.919	1.58252	5.97034e+07
610.645	2.17855	334.573	1.55409	5.83412e+07
641.666	2.23235	336.918	1.51152	5.63483e+07
660.541	2.30426	339.637	1.46699	5.42502e+07
678.276	2.38306	341.937	1.42466	5.23306e+07
696.989	2.46542	344.269	1.37743	5.02529e+07
716.764	2.54393	346.633	1.33449	4.83544e+07
740.397	2.6189	349.029	1.28542	4.62565e+07
786.499	2.69421	351.458	1.22935	4.39331e+07
860.14	2.68416	353.674	1.18519	4.20895e+07
931.5	2.61416	355.667	1.14151	4.03113e+07
995.753	2.55051	357.683	1.10651	3.88549e+07
1086.78	2.48432	359.722	1.07183	3.74238e+07
1225.13	2.42605	362.173	1.02472	3.55368e+07
1413.66	2.38443	364.132	0.992207	3.42242e+07
1670.77	2.35649	366.777	0.947428	3.24439e+07
2042.19	2.33582	369.461	0.903262	3.07068e+07
2625.95	2.32074	372.185	0.85787	2.89503e+07
3677.04	2.3104	374.949	0.816158	2.73396e+07
		377.754	0.776899	2.58313e+07
		381.08	0.736005	2.42579e+07
		384.222	0.694702	2.27094e+07
		387.912	0.65299	2.11428e+07
		390.915	0.621092	1.99555e+07
		395.509	0.587968	1.86719e+07
		398.631	0.558524	1.75979e+07
		404.216	0.524173	1.62874e+07
		410.794	0.489822	1.49763e+07
		417.589	0.462832	1.39208e+07
		426.406	0.434206	1.27898e+07
		437.49	0.405989	1.16556e+07
		449.166	0.380634	1.06436e+07
		461.482	0.35119	9.55822e+06
		474.493	0.321747	8.51674e+06
		488.259	0.293121	7.54025e+06
		502.847	0.271856	6.79035e+06
		518.334	0.258361	6.26046e+06
		540.531	0.259587	6.03188e+06
		558.777	0.278808	6.26695e+06
		574.35	0.308865	6.75432e+06
		584.884	0.338513	7.26935e+06
		594.293	0.366158	7.73851e+06
		601.73	0.39781	8.30355e+06
		609.355	0.431916	8.90262e+06
		618.31	0.466103	9.46816e+06
		624.428	0.496201	9.9808e+06
		633.834	0.528262	1.0468e+07
		638.847	0.55423	1.08964e+07
		650.158	0.59124	1.14218e+07
		669.558	0.626409	1.17506e+07
		697.299	0.628044	1.13126e+07
		717.106	0.590422	1.03411e+07
		768.986	0.467739	7.63968e+06
		780.879	0.416212	6.69454e+06
		796.273	0.372047	5.86847e+06
		809.032	0.332788	5.16644e+06
		821.093	0.286987	4.38994e+06
		835.818	0.254271	3.82098e+06
		849.887	0.21624	3.19568e+06
		860.754	0.183115	2.67199e+06
		871.902	0.16594	2.39041e+06
		891.139	0.132406	1.86618e+06
		919.541	0.0933524	1.2751e+06
		963.406	0.0542984	707893
		1021.9	0.0279217	343179

## Sheet: FTO
	Wavelength (nm)	Refractive Index (n)		Wavelength (nm)	Extinction Coeff (k)	Absorption Coeff alpha(1/m)	REFRENCE
	306.205	2.17056		305.175	0.025118	1.03378e+06	[38] J. M. Ball, S. D. Stranks, M. T. Hörantner, S. Hüttner,
	318.814	2.13782		317.796	0.016499	652077	W. Zhang, E. J. W. Crossland, I. Ramirez, M. Riede, M. B. Johnston, R. H. Friend, H. J. Snaith,
	331.418	2.09447		330.418	0.0112753	428603	Optical properties and limiting photocurrent of thin-film perovskite solar cells, Energy Environ. Science 8 (2015) 602-09.
	344.033	2.07279		343.041	0.00761879	278952	Supplementary materials
	356.649	2.05346		355.666	0.00683524	241380
	369.266	2.03753		368.29	0.00474578	161848
	381.884	2.02238		380.915	0.00474578	156484
	394.503	2.00958		393.54	0.00396223	126456
	407.122	1.99757		406.164	0.00213396	65989.4
	419.742	1.9866		418.789	0.00187278	56166.8
	432.362	1.97537		431.414	0.00187278	54523.2
	444.982	1.96597		444.039	0.00187278	52972.9
	457.603	1.95682		456.664	0.00187278	51508.4
	470.224	1.9482		469.289	0.00187278	50122.7
	482.845	1.93959		481.914	0.00187278	48809.6
	495.466	1.93097		494.539	0.00213396	54196.9
	508.087	1.92365		507.164	0.00187278	46379.6
	520.708	1.91556		519.789	0.00187278	45253.1
	533.329	1.90772		532.414	0.00187278	44180
	545.951	1.90067		545.039	0.00187278	43156.6
	558.572	1.89283		557.664	0.00187278	42179.6
	571.194	1.88552		570.29	0.00291751	64254.8
	583.816	1.87821		582.916	0.00474578	102257
	596.437	1.87142		595.541	0.00500696	105597
	609.059	1.8641		608.166	0.00474578	98011.1
	621.681	1.85731		620.791	0.00474578	96017.9
	633.873	1.85281		633.416	0.00474578	94104.1
	646.926	1.84765		646.041	0.00474578	92265.1
	659.548	1.84086		658.666	0.00474578	90496.6
	672.17	1.83381		671.292	0.00605169	113228
	684.791	1.82623		683.918	0.00761879	139917
	697.412	1.8184		696.543	0.00814115	146801
	710.034	1.81161		709.168	0.00761879	134936
	722.655	1.80377		721.793	0.00761879	132575
	735.277	1.79646		734.418	0.00761879	130296
	747.898	1.78862		747.043	0.00761879	128094
	760.519	1.78053		759.668	0.00761879	125966
	773.141	1.77321		772.294	0.00970825	157888
	785.762	1.76538		784.919	0.0104918	167886
	798.383	1.75754		797.545	0.012233	192649
	811.004	1.74918		810.17	0.0104918	162654
	823.625	1.74083		822.796	0.0125813	192053
	836.246	1.73247		835.421	0.0133648	200931
	848.867	1.72411		848.047	0.0157154	232754
	861.489	1.71575		860.672	0.0162378	236962
	874.109	1.70661		873.298	0.0162378	233537
	885.009	1.69946		885.923	0.0162378	230209
				895.679	0.0176743	247845
